# Supplementary material for: Sleep cycle-dependent vascular dynamics in male mice and the predicted effects on perivascular cerebrospinal fluid flow and solute transport
Source: Springer Nature journal article supplement (doi:10.1038/s41467-023-36643-5), 2023-02-20
Supplement: MOESM1 [file 41467_2023_36643_MOESM1_ESM.pdf]

# **Sleep cycle-dependent vascular dynamics in male mice and the predicted effects on perivascular cerebrospinal fluid flow and solute transport**

Laura Bojarskaite, Alexandra Vallet, Daniel M. Bjørnstad, Kristin M. Gullestad Binder, Céline Cunen, Kjell Heuser, Miroslav Kuchta, Kent-Andre Mardal, Rune Enger

## **Supplementary Information**

This supplementary information contains:

Supplementary figures 1–19

Supplementary tables 1–10

Statistical test details: effect sizes, degrees of freedom and p-values

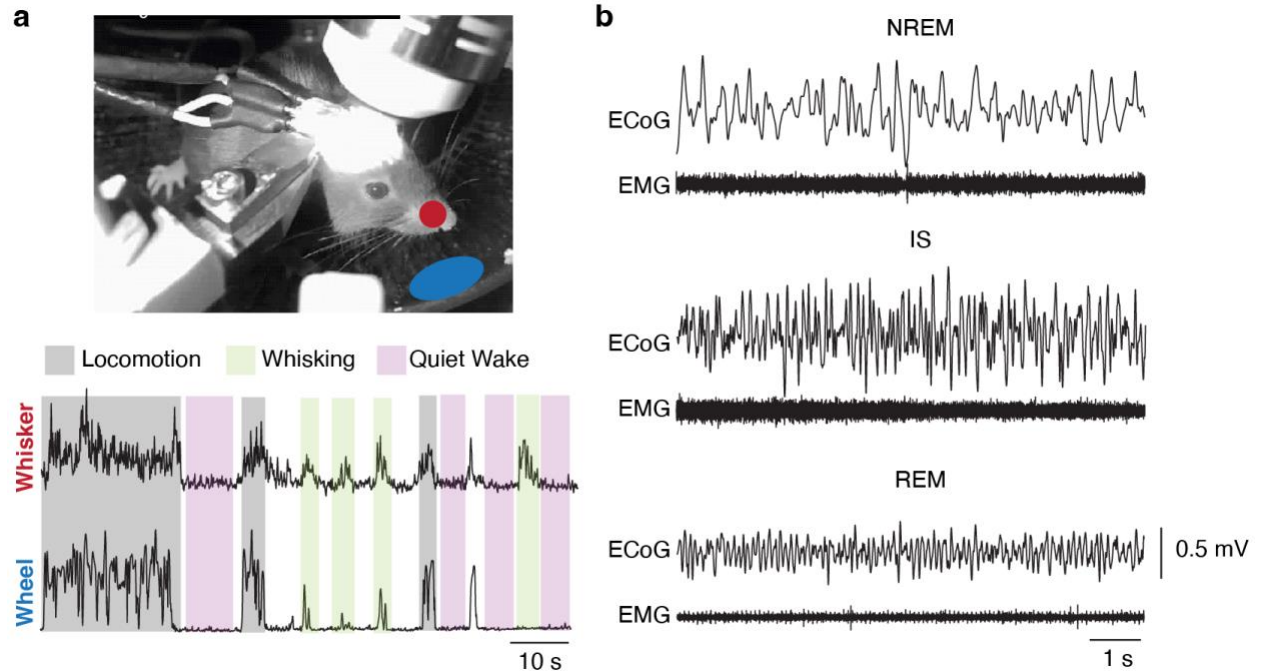

**Supplementary Fig. 1: Sleep-wake state scoring.** **a**, Wakefulness was separated into locomotion, whisking and quiet wakefulness based on movement detected in snout and running wheel regions in the surveillance video. **b**, Representative ECoG and EMG traces during NREM, IS and REM sleep. NREM: non-rapid eye movement sleep; IS: intermediate state sleep; REM: rapid eye movement sleep; ECoG: electrocorticography; EMG: electromyography.

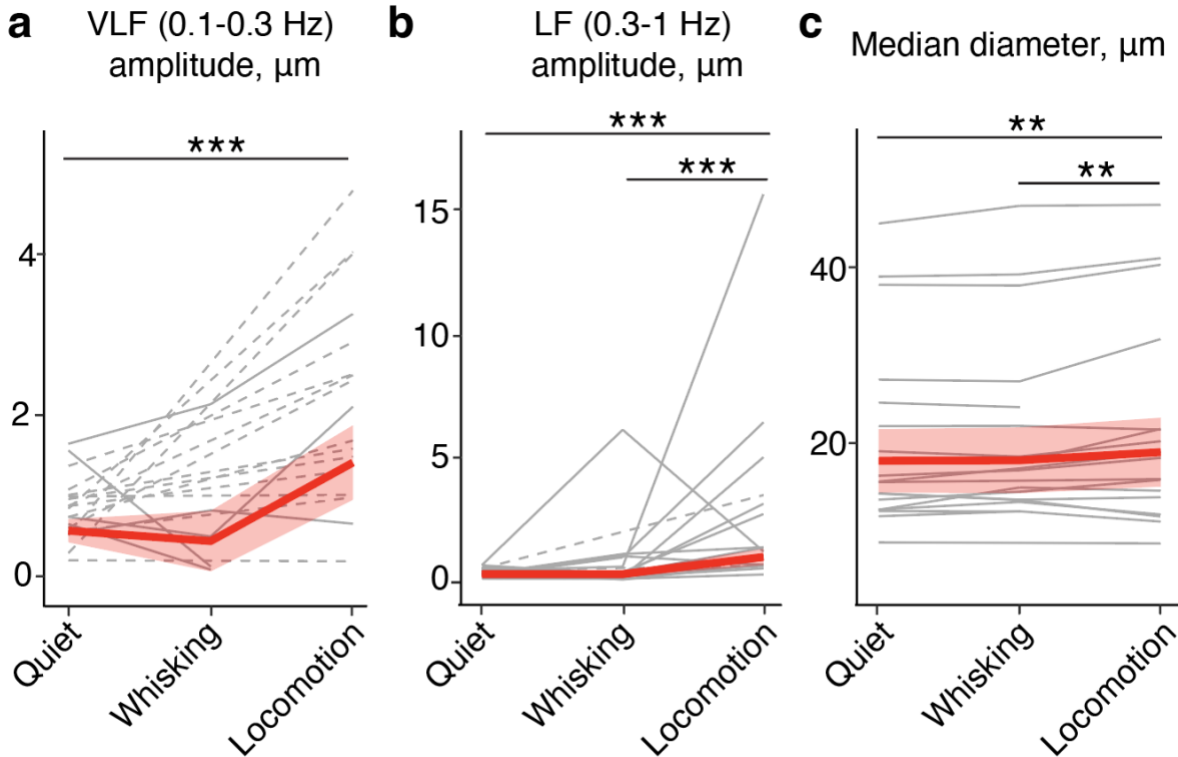

**Supplementary Fig. 2:** **a**, Amplitude of very low frequency (VLF 0.1–0.3 Hz) oscillations, **b**, amplitude of low frequency (LF 0.3-1 Hz) oscillations, and **c**, median diameter of lumen of pial arteries during quiet wakefulness, whisking and locomotion. Every gray line (dashed or full) represents an individual vessel, dashed lines are used when an observation is missing in a certain state for a given vessel (for example dashed line between Quiet and Locomotion means that we do not have an observation for that particular vessel in Whisking state), bold lines and shaded area are the estimates and 95% CI from linear mixed effects models (two-sided). For **a**:  $n = 498$  episodes, 19 vessels, 5 mice; for **b**:  $n = 797$  episodes, 19 vessels, 5 mice; for **c**  $n = 888$  episodes, 19 vessels, 5 mice.  $*P < 0.05$ ,  $**P < 0.01$ ,  $***P < 0.001$ , Tukey adjustment for multiple comparisons. See end of supplementary information for exact p-values, and degrees of freedom for the statistical tests. Source data are provided as a Source Data file.

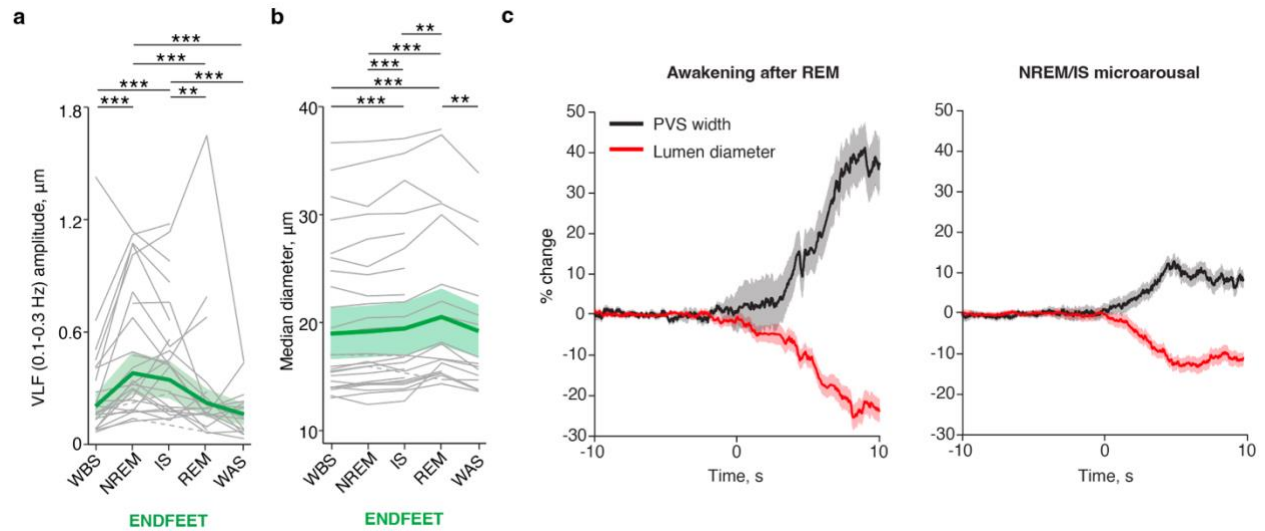

**Supplementary Fig. 3:** **a**, Amplitude of very low frequency (VLF 0.1–0.3 Hz) oscillations and **b**, median diameter of enfoot tube during a sleep cycle. Every gray line (dashed or full) represents an individual vessel, dashed lines are used when an observation is missing in a certain state for a given vessel (for example dashed line between WBS and IS means that we do not have an observation for that particular vessel in NREM state), bold lines and shaded area are the estimates and 95% CI from linear mixed effects models (two-sided). **c**, Median percentage change in PVS width and lumen diameter of penetrating arterioles during brief awakening from REM sleep (*left*) and during microarousals in NREM and IS sleep (*right*). For **a**:  $n = 306$  episodes, 25 vessels, 4 mice; for **b**:  $n = 310$  episodes, 25 vessels, 4 mice; for **c**:  $n = 5$  mice, 15 awakenings after REM, 90 microarousals.  $*P < 0.05$ ,  $**P < 0.01$ ,  $***P < 0.001$ , Tukey adjustment for multiple comparisons. WBS: wake before sleep; NREM: non-rapid eye movement sleep; IS: intermediate state sleep; REM: rapid eye movement sleep; WAS: wake after sleep; PVS: perivascular space. See end of supplementary information for exact p-values, and degrees of freedom for the statistical tests. Source data are provided as a Source Data file.

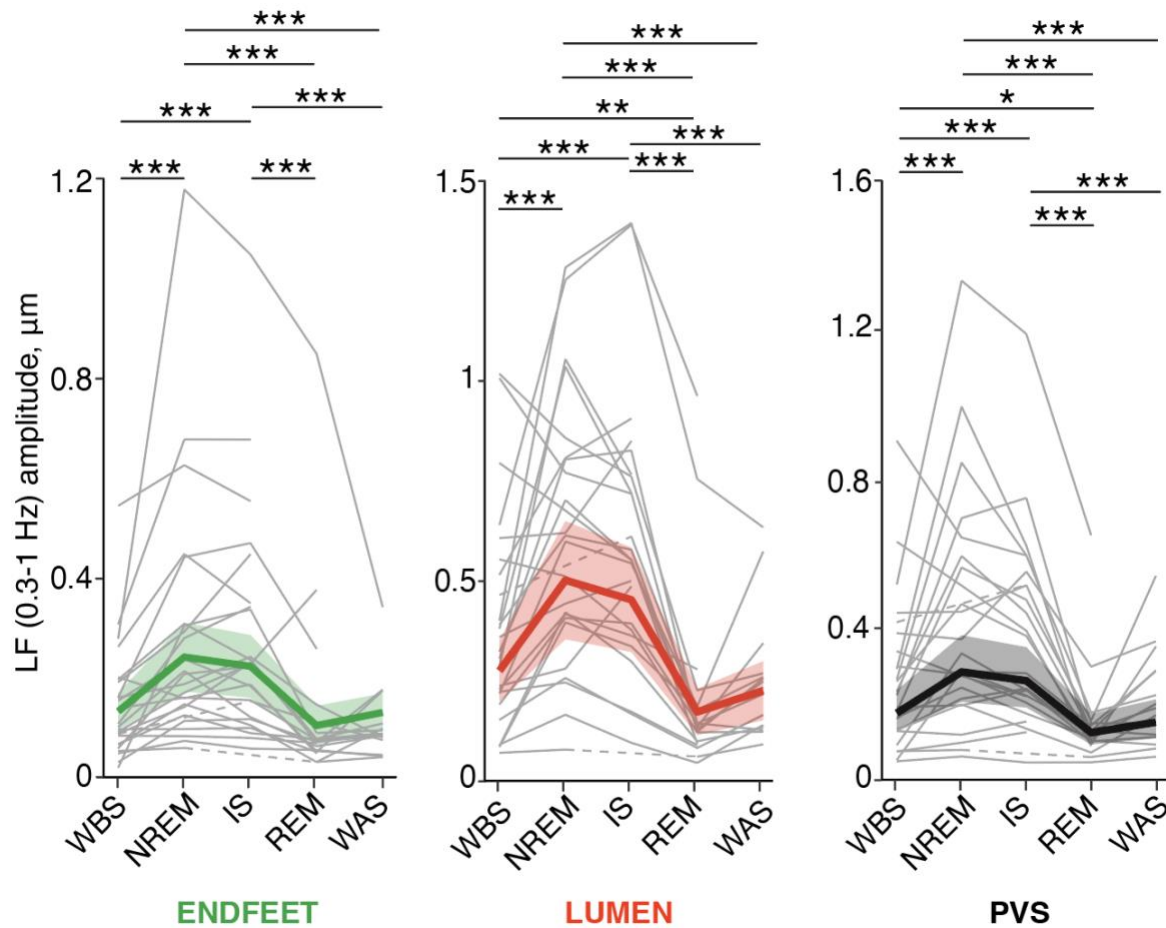

**Supplementary Fig. 4:** Amplitude of low frequency (LF 0.3–1 Hz) oscillations in endfoot tube, lumen and PVS during a sleep cycle. Every gray line (dashed or full) represents an individual vessel, dashed lines are used when an observation is missing in a certain state for a given vessel (for example dashed line between WBS and IS means that we do not have an observation for that particular vessel in NREM state), bold lines and shaded area are the estimates and 95% CI from linear mixed effects models (two-sided),  $n = 310$  episodes, 25 vessels, 4 mice. \* $P < 0.05$ , \*\* $P < 0.01$ , \*\*\* $P < 0.001$ , Tukey adjustment for multiple comparisons. WBS: wake before sleep; NREM: non-rapid eye movement sleep; IS: intermediate state sleep; REM: rapid eye movement sleep; WAS: wake after sleep; PVS: perivascular space. See end of supplementary information for exact p-values, and degrees of freedom for the statistical tests. Source data are provided as a Source Data file.

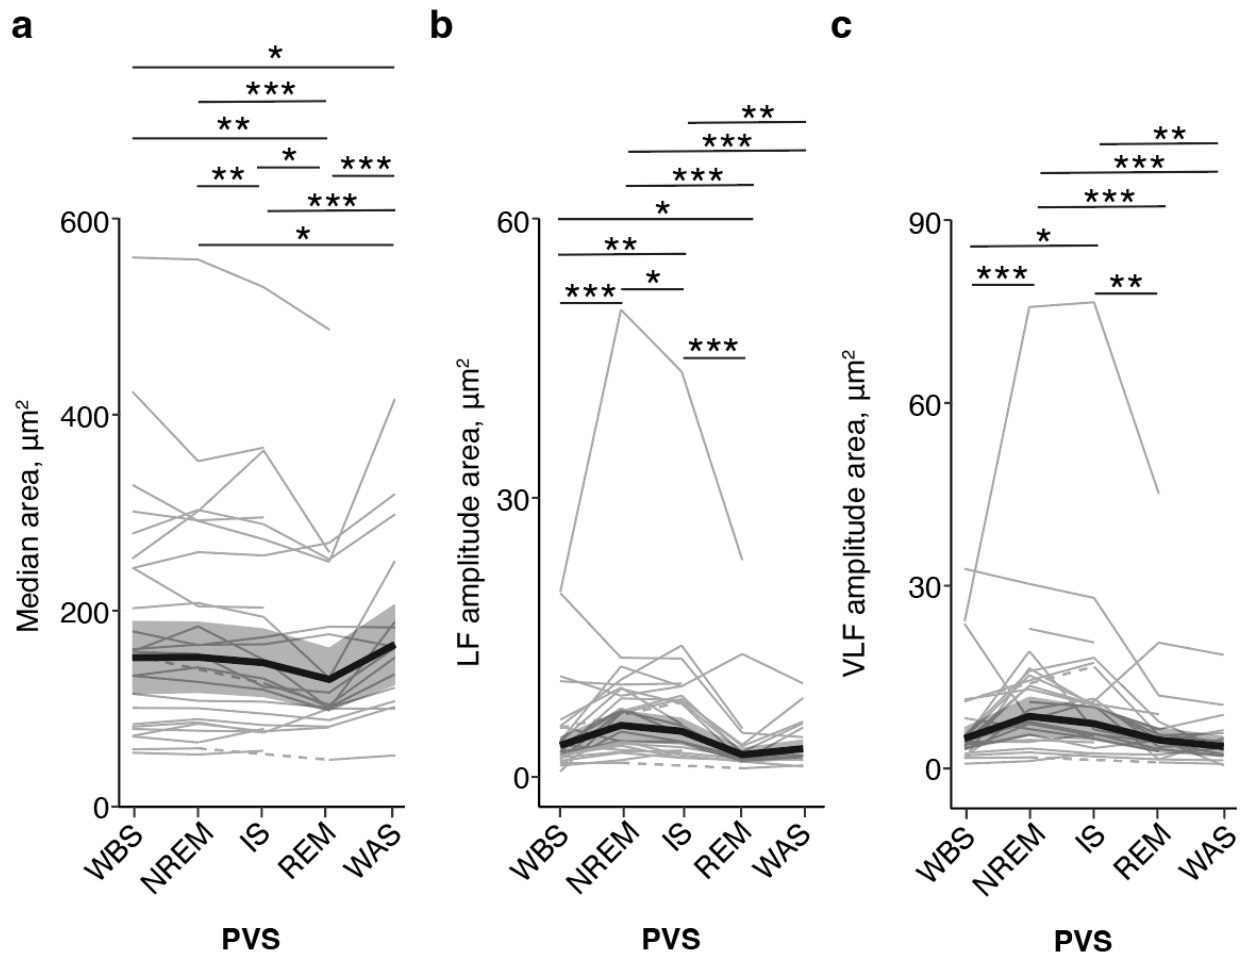

**Supplementary Fig. 5: a**, Median PVS area, **b**, LF amplitude in PVS area and **c**, VLF amplitude in PVS area during a sleep cycle. Every gray line (dashed or full) represents an individual vessel, dashed lines are used when an observation is missing in a certain state for a given vessel (for example dashed line between WBS and IS means that we do not have an observation for that particular vessel in NREM state), bold lines and shaded area are the estimates and 95% CI from linear mixed effects models (two-sided). For **a** and **b**:  $n = 310$  episodes, 25 vessels, 4 mice; for **c**:  $n = 304$  episodes, 25 vessels, 4 mice.  $*P < 0.05$ ,  $**P < 0.01$ ,  $***P < 0.001$ , Tukey adjustment for multiple comparisons. WBS: wake before sleep; NREM: non-rapid eye movement sleep; IS: intermediate state sleep; REM: rapid eye movement sleep; WAS: wake after sleep; LF: low frequency; PVS: perivascular space. See end of supplementary information for exact p-values, and degrees of freedom for the statistical tests. Source data are provided as a Source Data file.



Locomotion means that we do not have an observation for that particular vessel in Whisking state), bold lines and shaded area are the estimates and 95% CI from linear mixed effects models (two-sided). **a:** n = 127 episodes, 16 vessels, 3 mice for endfoot tube and lumen, n = 134 episodes, 16 vessels, 3 mice for PVS; **b:** n = 236 episodes, 17 vessels, 3 mice for endfoot tube, n = 228 episodes, 17 vessels, 3 mice for lumen, n = 244 episodes, 17 vessels, 3 mice for PVS; **c:** n = 262 episodes, 17 vessels, 3 mice **d:** n = 134 episodes, 16 vessels, 3 mice for VLF amplitude, n = 243 episodes, 17 vessels, 3 mice for LF amplitude, n = 262 episodes, 17 vessels, 3 mice for median area. \* $P < 0.05$ , \*\* $P < 0.01$ , \*\*\* $P < 0.001$ , Tukey adjustment for multiple comparisons. See end of supplementary information for exact p-values, and degrees of freedom for the statistical tests. PVS: perivascular space. Source data are provided as a Source Data file.



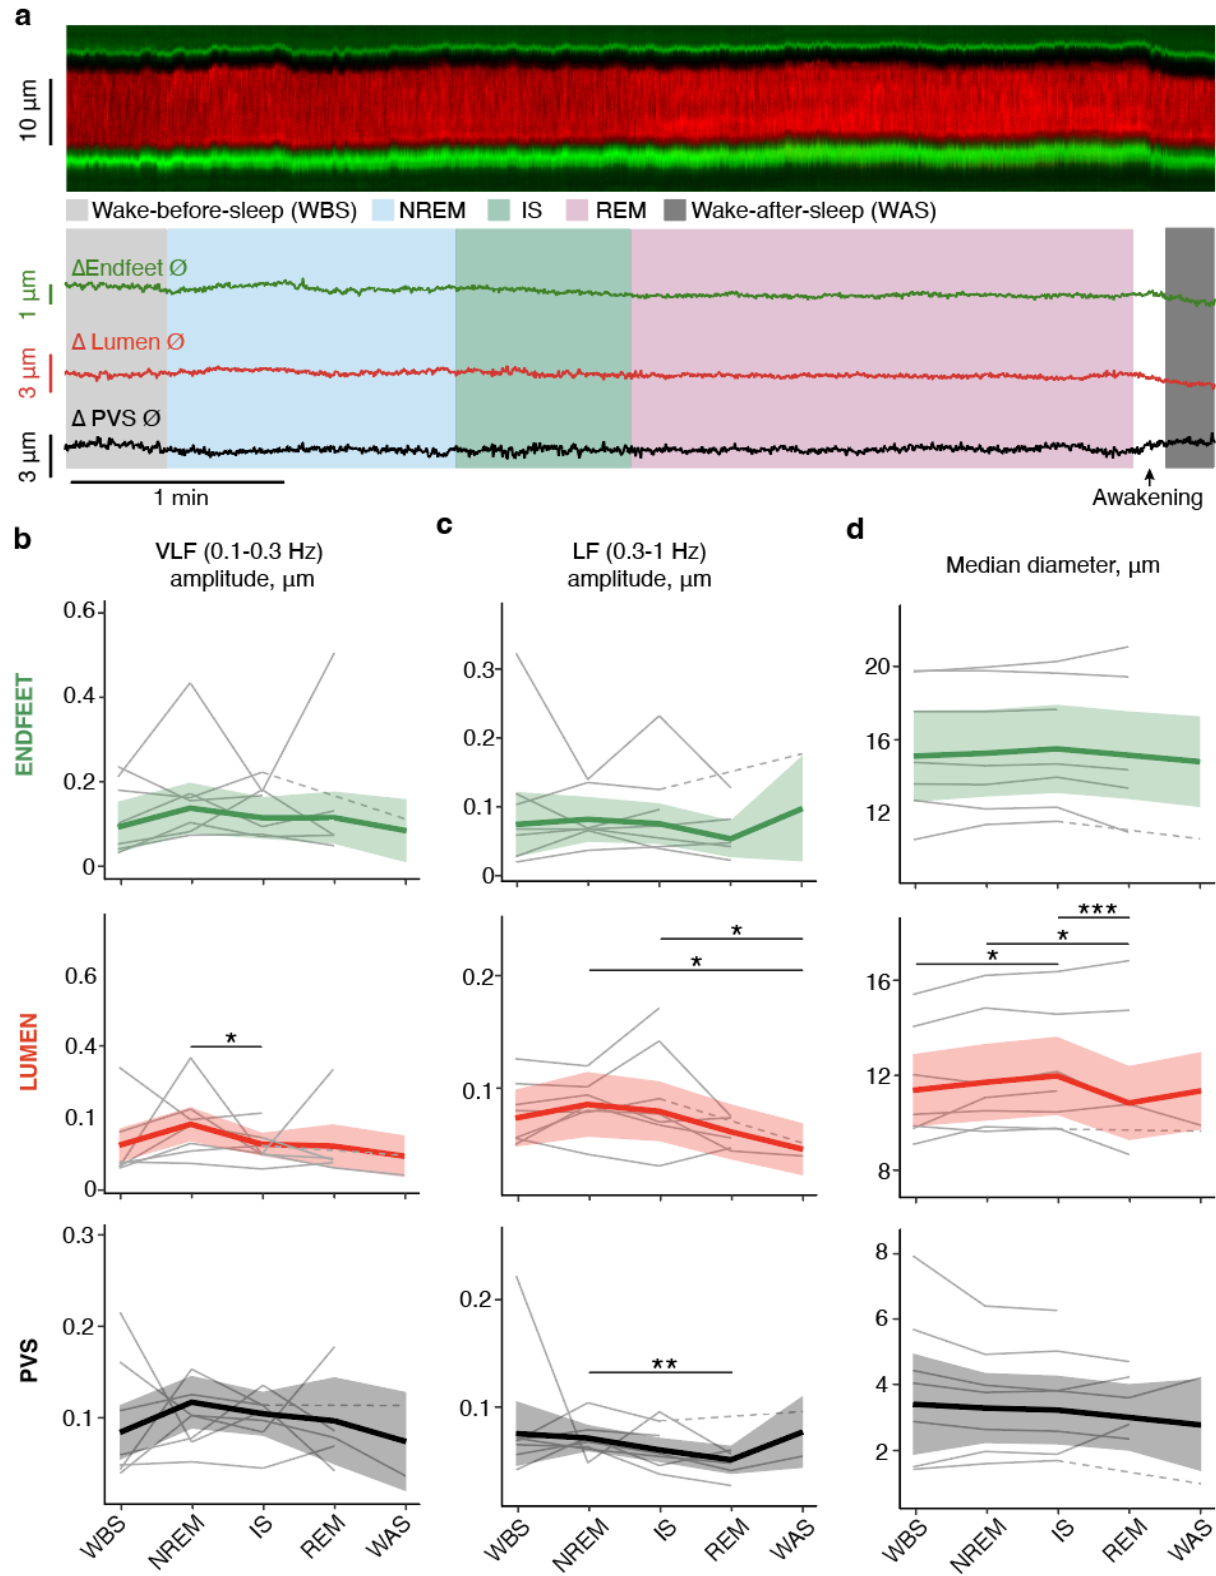

**Supplementary Fig. 7: a**, Representative traces of a venule line scan, endfoot tube diameter, vessel lumen diameter and PVS width during a sleep cycle. **b**, Amplitude of very low frequency

(VLF 0.1–0.3 Hz) oscillations, **c**, amplitude of low frequency (LF 0.3–1 Hz) oscillations, and **d**, median diameter (width for PVS) of (*top-to-bottom*) endfoot tube, lumen and PVS of venules throughout a sleep cycle. Every gray line (dashed or full) represents an individual vessel, dashed lines are used when an observation is missing in a certain state for a given vessel (for example dashed line between WBS and IS means that we do not have an observation for that particular vessel in NREM state), bold lines and shaded area are the estimates and 95% CI from linear mixed effects models (two-sided),  $n = 90$  episodes, 7 vessels, 3 mice.  $*P < 0.05$ ,  $**P < 0.01$ ,  $***P < 0.001$ , Tukey adjustment for multiple comparisons. WBS: wake before sleep; NREM: non-rapid eye movement sleep; IS: intermediate state sleep; REM: rapid eye movement sleep; WAS: wake after sleep; PVS: perivascular space. See end of supplementary information for exact p-values, and degrees of freedom for the statistical tests. Source data are provided as a Source Data file.

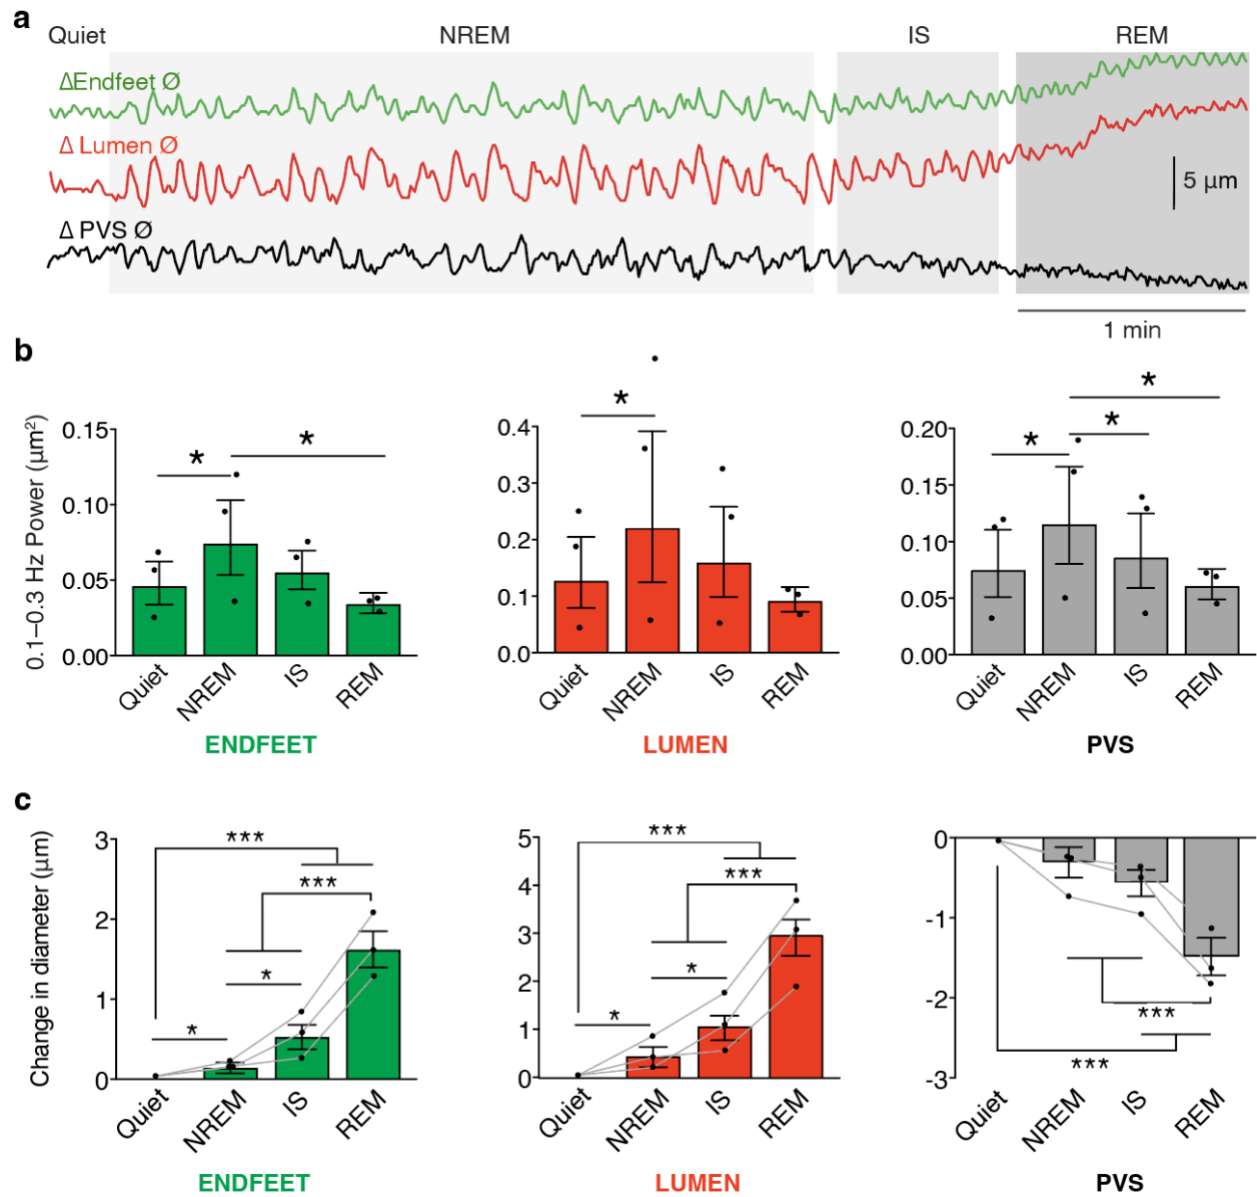

**Supplementary Fig. 8: 2D time-series analysis of vascular dynamics across the sleep cycle. a,** Representative traces of a penetrating arteriole endfoot tube diameter, vessel lumen diameter and PVS total width during quiet wakefulness, NREM, IS and REM sleep states. **b,** Diameter oscillation power in the 0.1–0.3 Hz frequency range of endfoot tube, vessel lumen and PVS during quiet wakefulness, NREM, IS and REM sleep. Data represented as estimates  $\pm$  standard error,  $n = 3$  mice, 72 arterioles. Estimates from each mouse is scattered on top of the bar graphs. **c,** Change in the median diameter per sleep state of the endfoot tube, vessel lumen, and perivascular space of penetrating arterioles from quiet wakefulness to NREM, IS and REM sleep. Data represented as

estimates from linear mixed effects model (two-sided, no adjustment for multiple comparisons)  $\pm$  SE, n = 3 mice, 136 arterioles. \* $P < 0.05$ , \*\* $P < 0.01$ , \*\*\* $P < 0.001$ . NREM: non-rapid eye movement sleep; IS: intermediate state sleep; REM: rapid eye movement sleep; PVS: perivascular space. Source data are provided as a Source Data file.

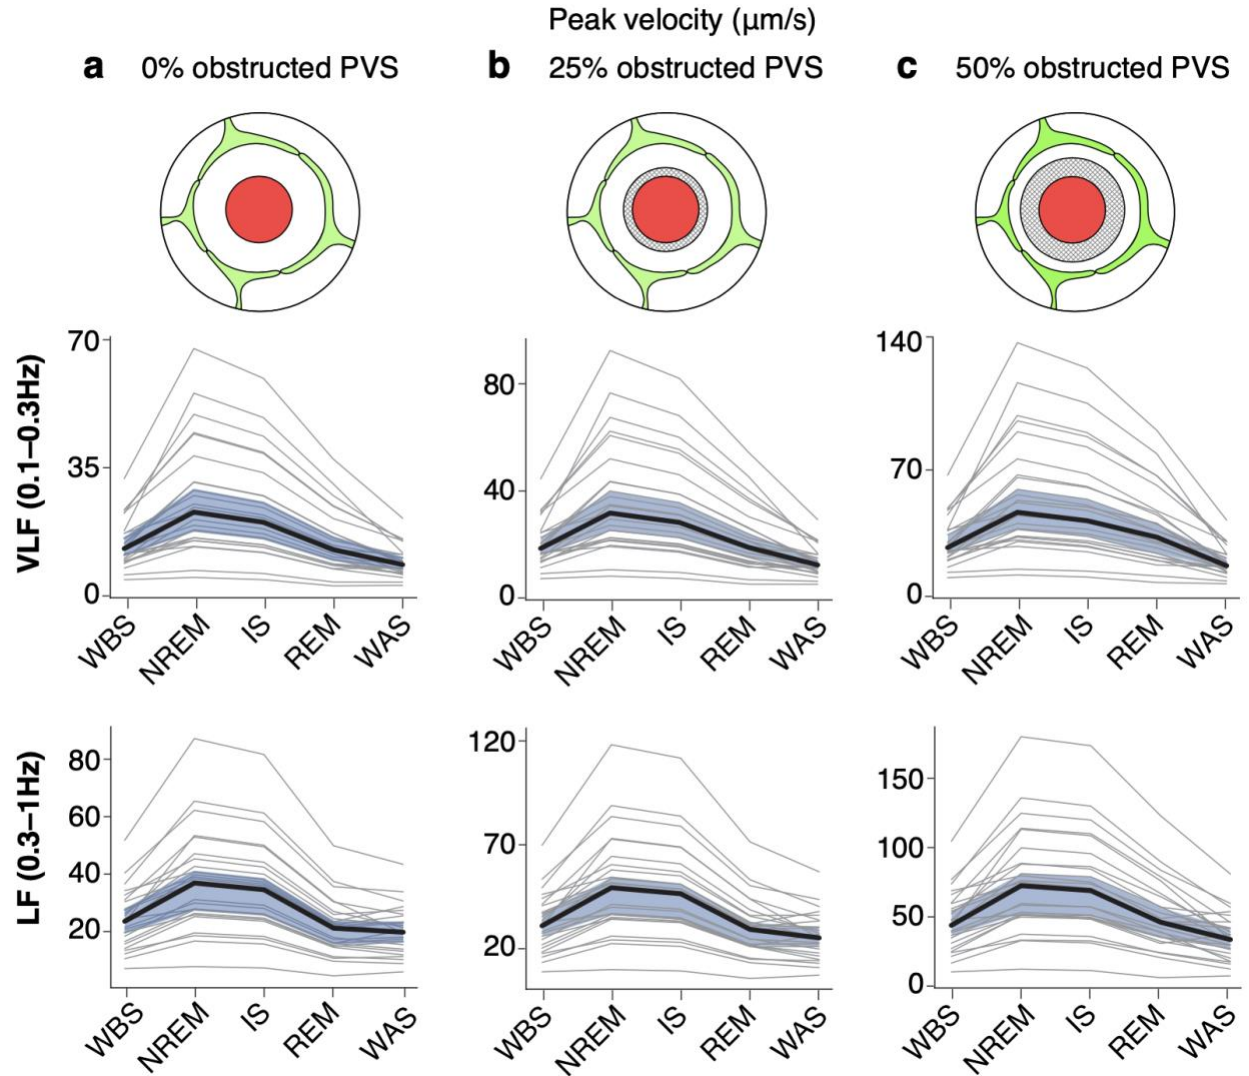

**Supplementary Fig. 9: NREM/IS slow vasomotion increases predicted PVS fluid velocity.** **a-c**, Peak fluid velocity in penetrating arteriole PVS generated by VLF and LF oscillations during a sleep cycle as predicted by biomechanical modeling using three where we added a fixed volume to the PVS obstructing flow corresponding to 0%, 25% and 50% of our measured PVS in quiet wakefulness. Gray lines represent observations from individual penetrating arterioles while bolded black lines with the blue shading are median values with 10<sup>th</sup> and 90<sup>th</sup> percentiles,  $n = 16$  vessels, 4 mice. WBS: wake before sleep; NREM: non-rapid eye movement sleep; IS: intermediate state sleep; REM: rapid eye movement sleep; WAS: wake after sleep; PVS: perivascular space; VLF: very low frequency; LF: low frequency. Source data are provided as a Source Data file.

Enhancement factor (%) 70kDa,  $D = 2 \times 10^{-7} \text{ cm}^2/\text{s}$

**a** 0% obstructed PVS

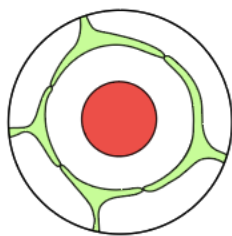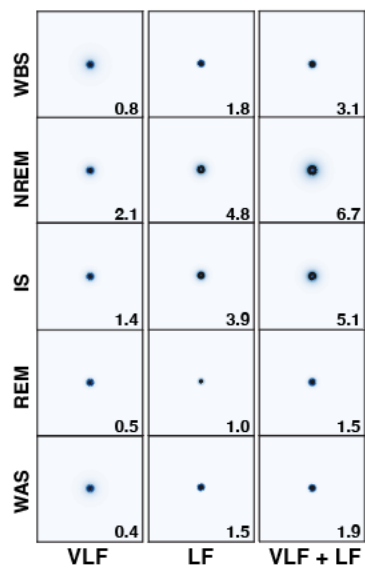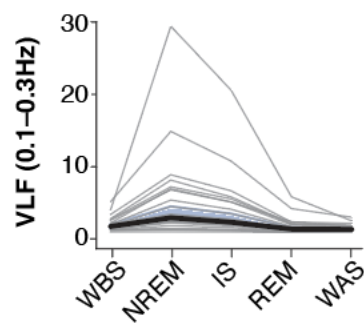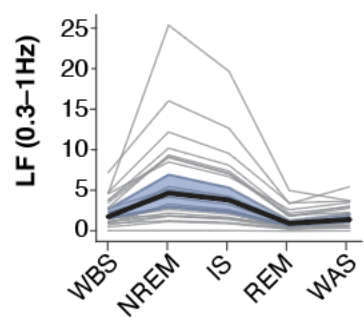

**b** 25% obstructed PVS

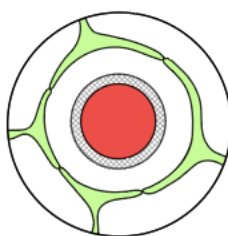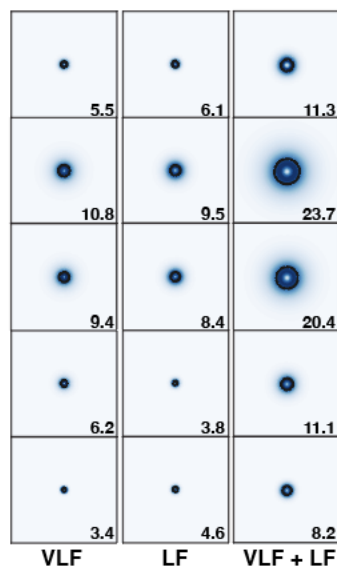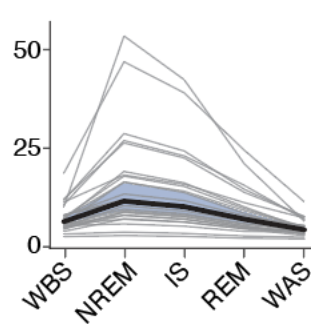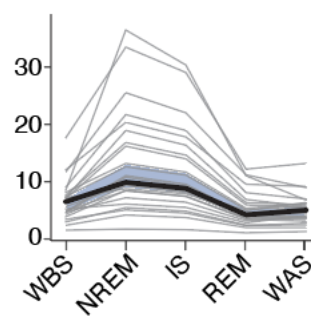

**c** 50% obstructed PVS

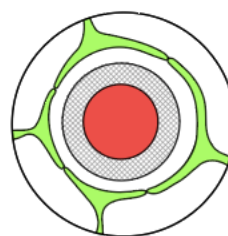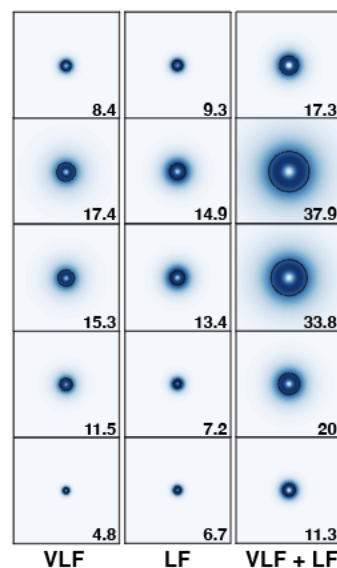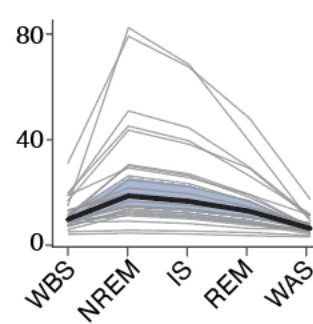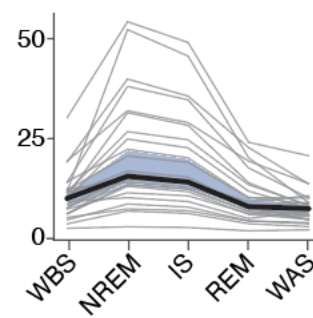

**Supplementary Fig. 10. NREM/IS slow vasomotion enhances predicted dispersion in PVS.**

**a-c,** Enhancement factor for 70 kDa tracer spread in penetrating arteriole PVS generated by VLF and LF oscillations during a sleep cycle as predicted by biomechanical modeling using three scenarios where we added a fixed volume to the PVS obstructing flow corresponding to 0%, 25% and 50% of our measured PVS in quiet wakefulness. The enhancement factor is the relative increase in solute movement induced by VLF and LF oscillatory flow, compared to pure diffusion. The black circle represents the median, whereas the shading represents the distribution of all modeled vessels ( $n = 16$  vessels, 4 mice). Gray lines represent observations from individual penetrating arterioles while bolded black lines with the blue shading are median values with 10<sup>th</sup> and 90<sup>th</sup> percentiles,  $n = 16$  vessels, 4 mice. WBS: wake before sleep; NREM: non-rapid eye movement sleep; IS: intermediate state sleep; REM: rapid eye movement sleep; WAS: wake after sleep; PVS: perivascular space; VLF: very low frequency; LF: low frequency. Source data are provided as a Source Data file.

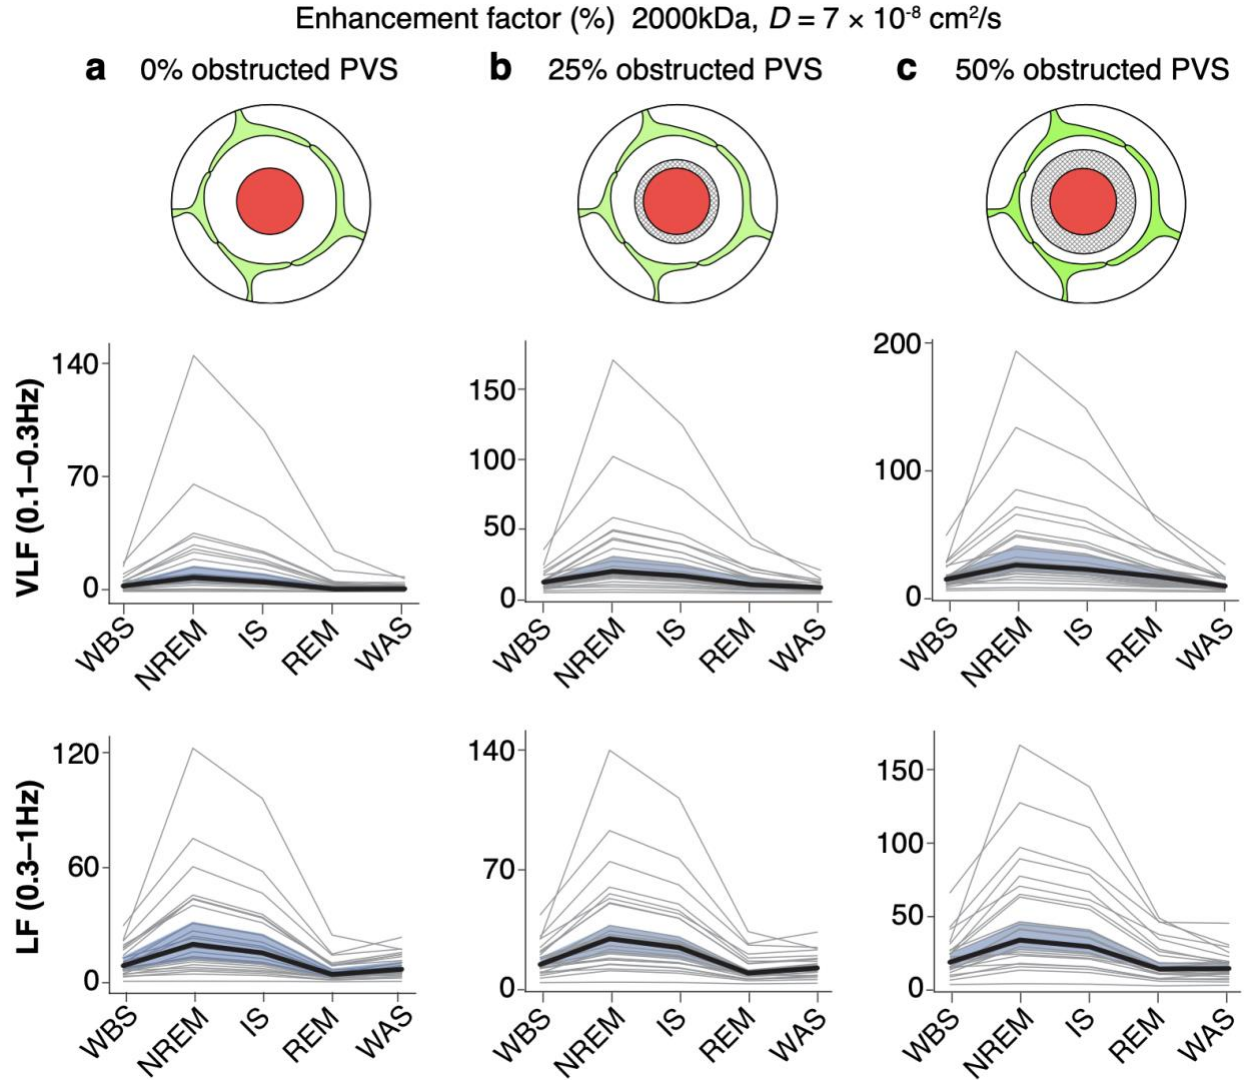

**Supplementary Fig. 11: NREM/IS slow vasomotion enhances predicted dispersion in PVS.**

**a-c**, Enhancement factor for 2000 kDa tracer spread in penetrating arteriole PVS generated by VLF and LF oscillations during a sleep cycle as predicted by biomechanical modeling using three scenarios where we added a fixed volume to the PVS obstructing flow corresponding to 0%, 25% and 50% of our measured PVS in quiet wakefulness. The enhancement factor is the relative increase in solute movement induced by VLF and LF oscillatory flow, compared to pure diffusion. Gray lines represent observations from individual penetrating arterioles while bolded black lines with the blue shading are median values with 10<sup>th</sup> and 90<sup>th</sup> percentiles,  $n = 16$  vessels, 4 mice. WBS: wake before sleep; NREM: non-rapid eye movement sleep; IS: intermediate state sleep; REM: rapid eye movement sleep; WAS: wake after sleep; PVS: perivascular space; VLF: very low frequency; LF: low frequency. Source data are provided as a Source Data file.



**a** Enhancement factor (%)  
70kDa,  $D = 2 \times 10^{-7} \text{ cm}^2/\text{s}$

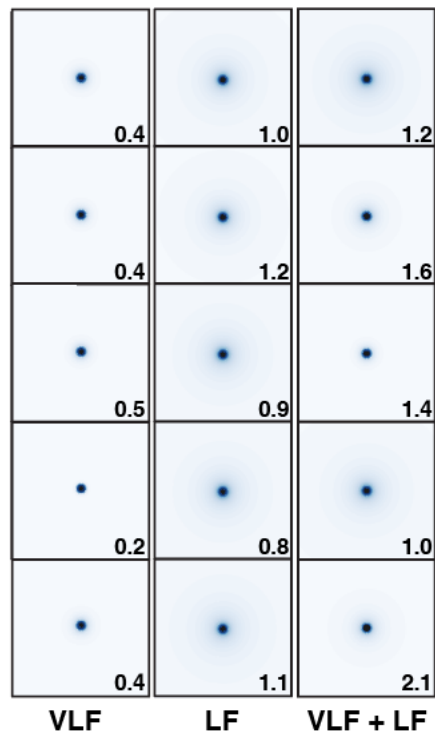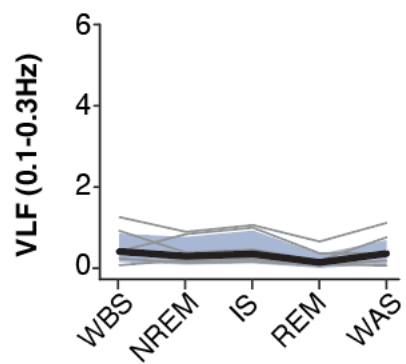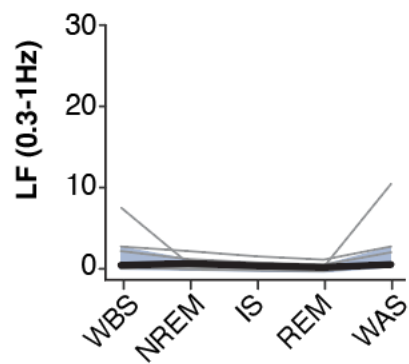

**b** Enhancement factor (%)  
2000kDa,  $D = 7 \times 10^{-8} \text{ cm}^2/\text{s}$

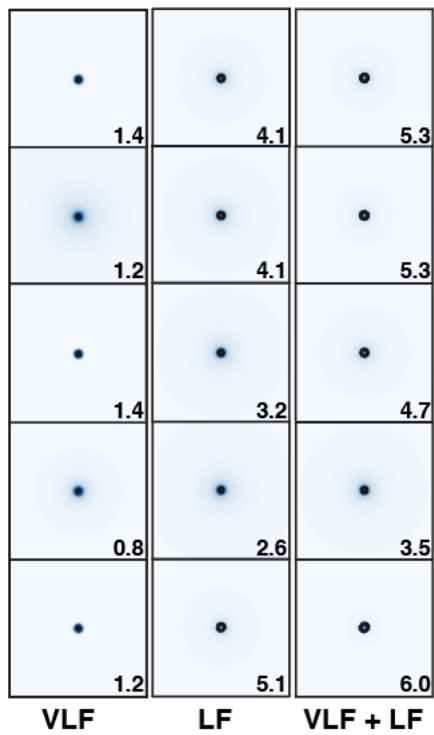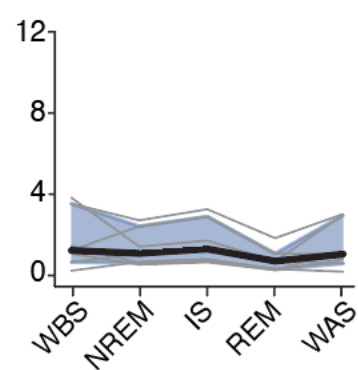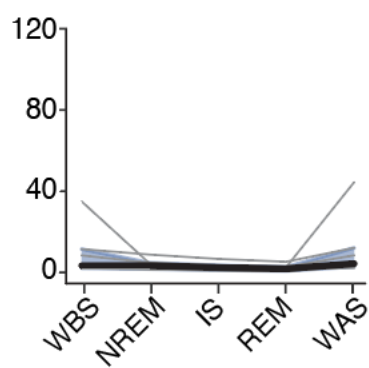

**Supplementary Fig. 12: Predicted dispersion of solutes across sleep-wake cycle in venule PVS. a-b,** Enhancement factor for 70 kDa and 2000 kDa tracer spread in venule PVS generated by VLF and LF oscillations during a sleep cycle as predicted by biomechanical modeling. The black circle represents the median, whereas the shading represents the distribution of all modeled vessels. The enhancement factor is the relative increase in solute movement induced by VLF and LF oscillatory flow, compared to pure diffusion. Gray lines represent observations from individual penetrating arterioles while bolded black lines with the blue shading are median values with 10<sup>th</sup> and 90<sup>th</sup> percentiles, n = 7 vessels, 4 mice. WBS: wake before sleep; NREM: non-rapid eye movement sleep; IS: intermediate state sleep; REM: rapid eye movement sleep; WAS: wake after sleep; PVS: perivascular space; VLF: very low frequency; LF: low frequency. Source data are provided as a Source Data file.

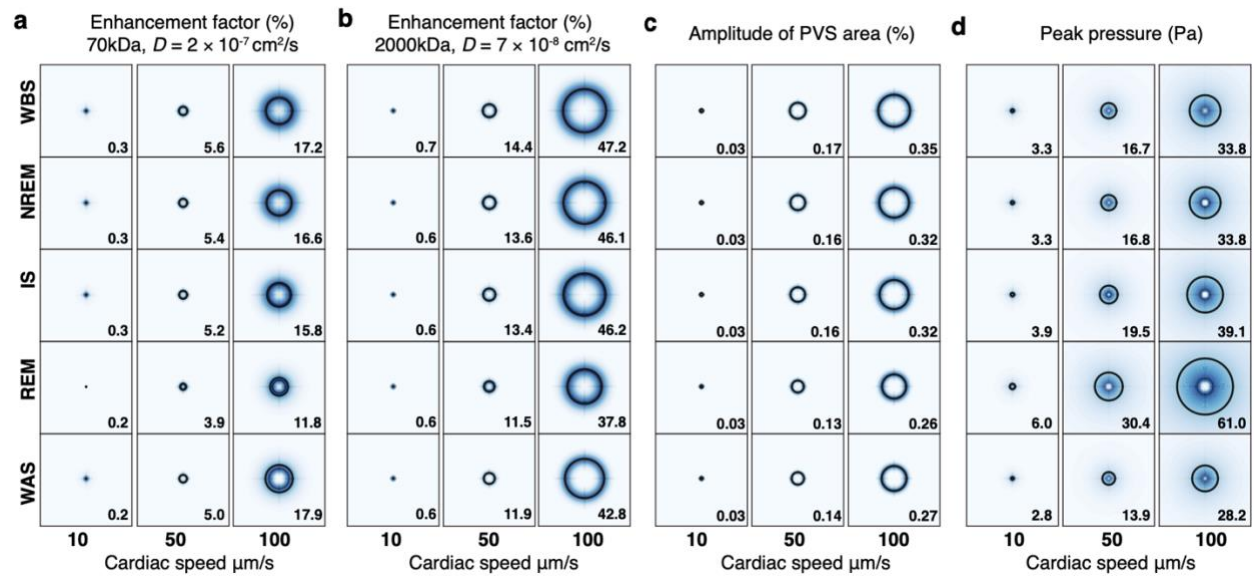

**Supplementary Fig. 13: Biomechanical modeling of CSF flow and solute transport in penetrating arteriole PVS generated by cardiac pulsations with different peak CSF velocities.** **a**, Enhancement factor for 70 kDa solutes, **b**, enhancement factor for 2000 kDa solutes, **c**, amplitude of PVS area, and **d**, peak pressure generated by cardiac pulsations with peak CSF velocity of 10, 50 or 100  $\mu\text{m/s}$  across states of a sleep cycle as predicted by biomechanical modeling. The blue color surface represents the distribution obtained from all observations, the black line is the median of the observations. WBS: wake before sleep; NREM: non-rapid eye movement sleep; IS: intermediate state sleep; REM: rapid eye movement sleep; WAS: wake after sleep; PVS: perivascular space. Source data are provided as a Source Data file.

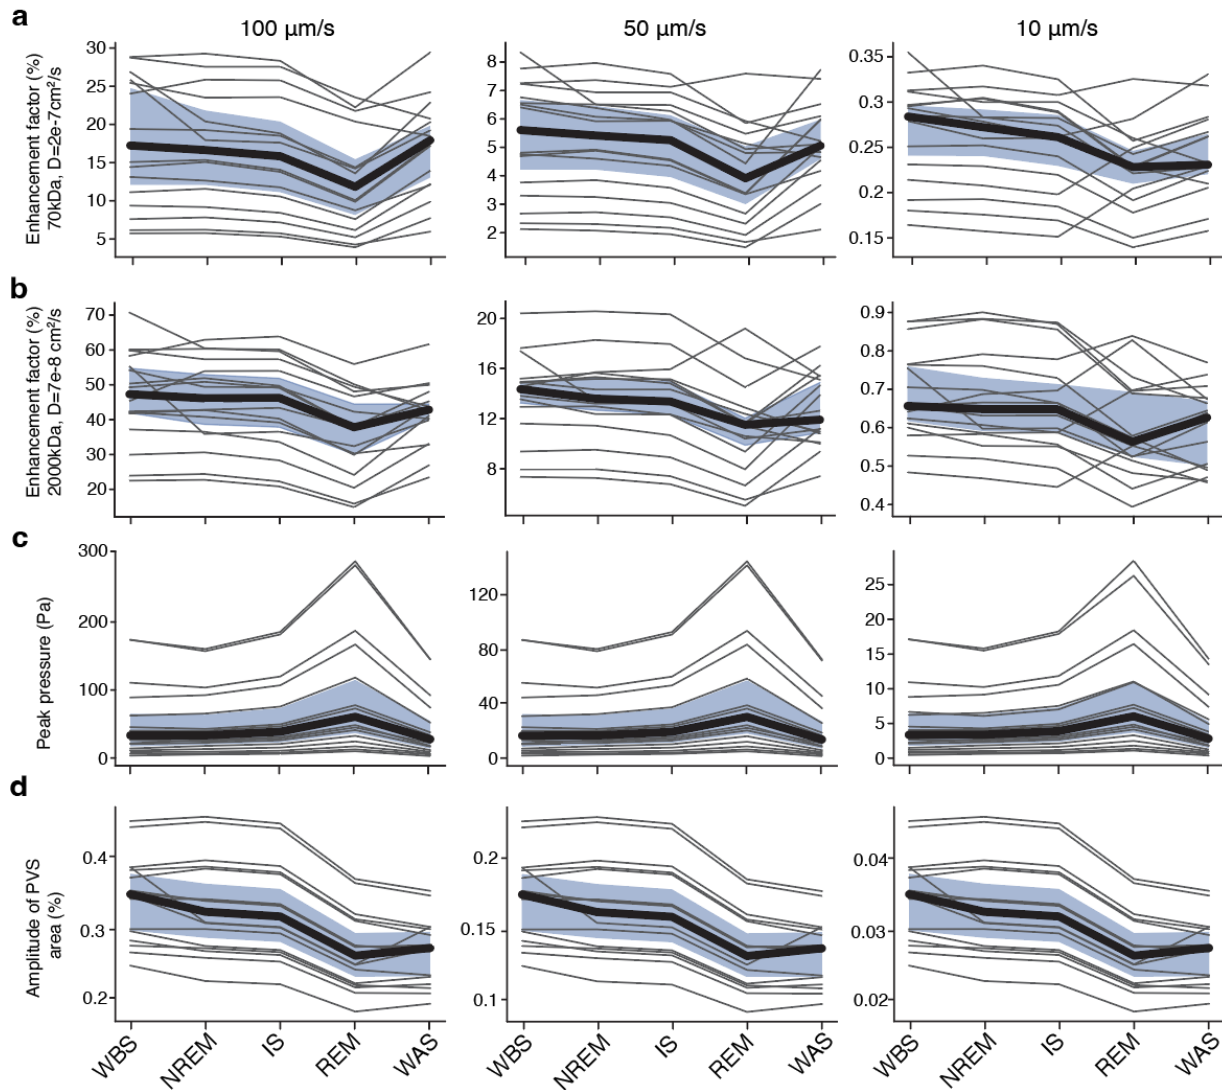

**Supplementary Fig. 14: Biomechanical modeling of CSF flow and solute transport in penetrating arteriole PVS generated by cardiac pulsations with different peak CSF velocities.** **a**, Enhancement factor for 70 kDa solutes, **b**, enhancement factor for 2000 kDa solutes, **c**, peak pressure, and **d**, amplitude of PVS area, generated by cardiac pulsations with peak CSF velocity of 100, 50 or 10  $\mu\text{m/s}$  across the states of a sleep cycle as predicted by biomechanical modeling. Gray lines represent observations from individual penetrating arterioles while bolded black lines with the blue shading are median values with 10<sup>th</sup> and 90<sup>th</sup> percentiles,  $n = 16$  vessels, 4 mice. WBS: wake before sleep; NREM: non-rapid eye movement sleep; IS: intermediate state sleep; REM: rapid eye movement sleep; WAS: wake after sleep; PVS: perivascular space. Source data are provided as a Source Data file.

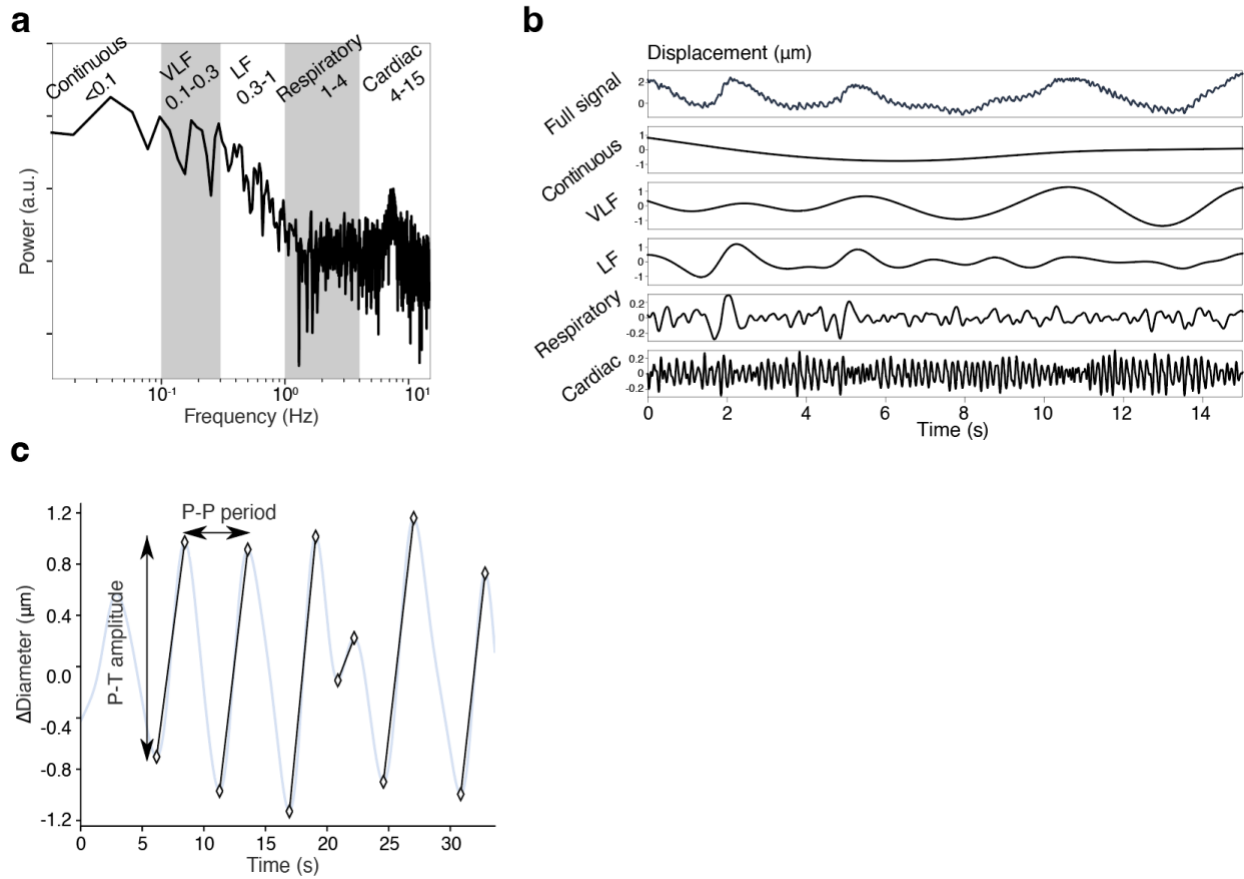

**Supplementary Fig. 15:** **a**, Power spectrum of vessel diameter oscillations and different frequency bands used for analysis. **b**, Signal decomposition into continuous, VLF, LF, respiratory and cardiac frequency bands. **c**, Amplitude of oscillations in different frequency bands was calculated as peak-to-trough (P-T), while period as peak-to-peak (P-P). VLF: very low frequency; LF: low frequency.

# RESPIRATORY FREQUENCIES (1-4 Hz)

**a**

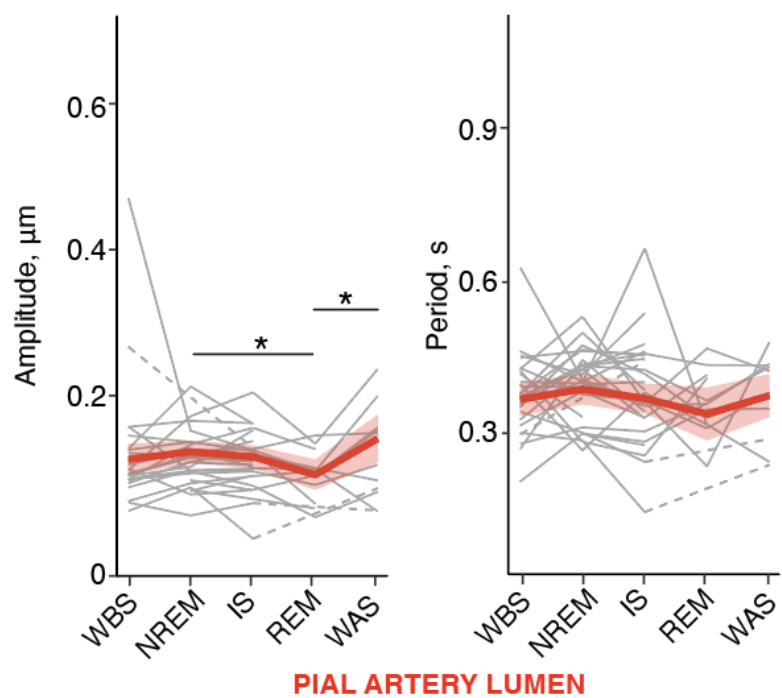

# CARDIAC FREQUENCIES (4-15 Hz)

**b**

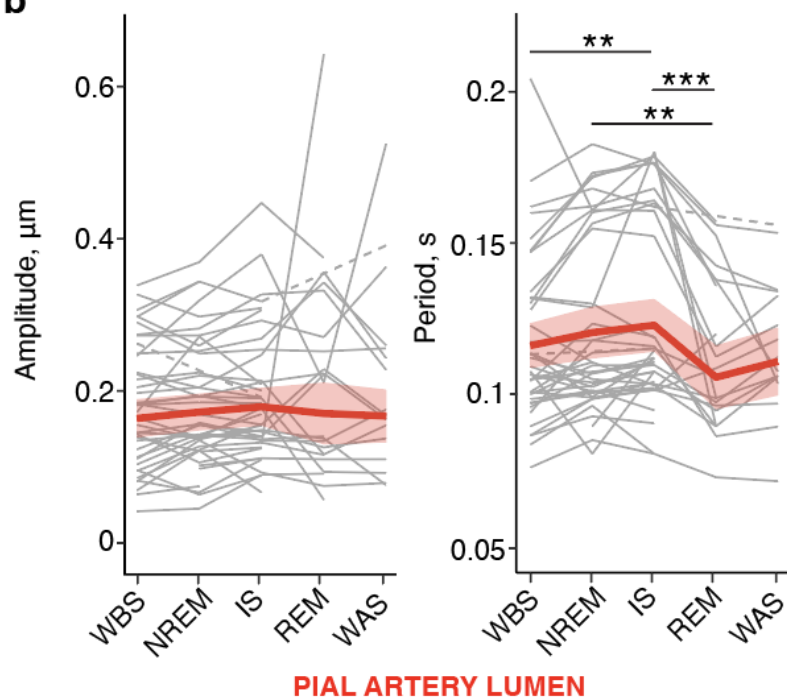

**Supplementary Fig. 16:** Amplitude and period of **a**, respiratory (1-4Hz) and **b**, cardiac (4-15Hz) frequencies of pial artery lumen throughout a sleep cycle. Gray lines represent the individual pial arteries, dashed lines indicate that a particular artery has no observations in a certain state, bold lines and shaded area are the estimates and 95% CI from linear mixed effects models (two-sided),  $n = 343$  episodes, 30 pial arteries, 5 mice for **a**,  $n = 487$  episodes, 43 pial arteries, 4 mice for **b**.  $*P < 0.05$ ,  $**P < 0.01$ ,  $***P < 0.001$ , Tukey adjustment for multiple comparisons. WBS: wake before sleep; NREM: non-rapid eye movement sleep; IS: intermediate state sleep; REM: rapid eye movement sleep; WAS: wake after sleep. See end of supplementary information for exact p-values, and degrees of freedom for the statistical tests. Source data are provided as a Source Data file.

# RESPIRATORY FREQUENCIES (1-4 Hz)

**a**

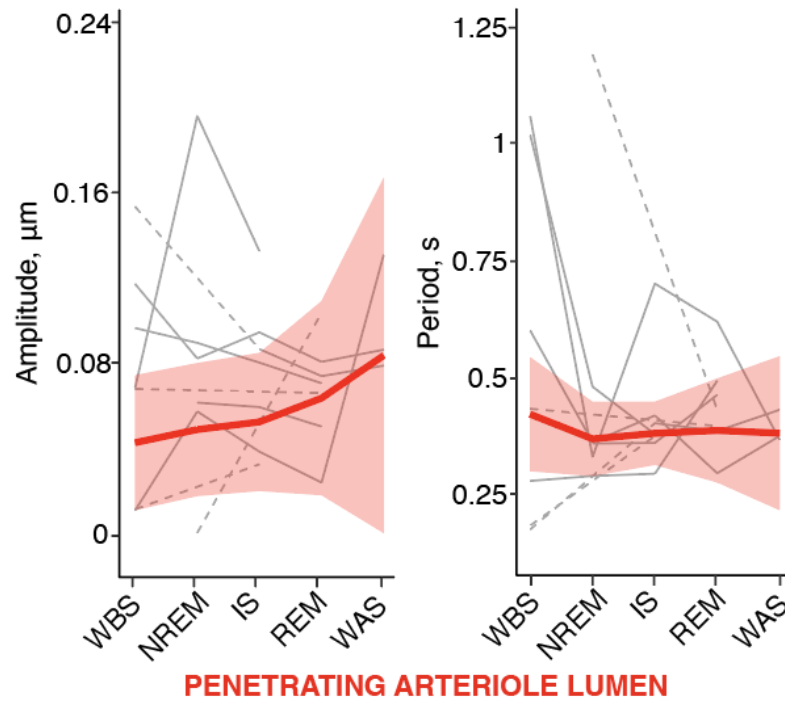

# CARDIAC FREQUENCIES (4-15 Hz)

**b**

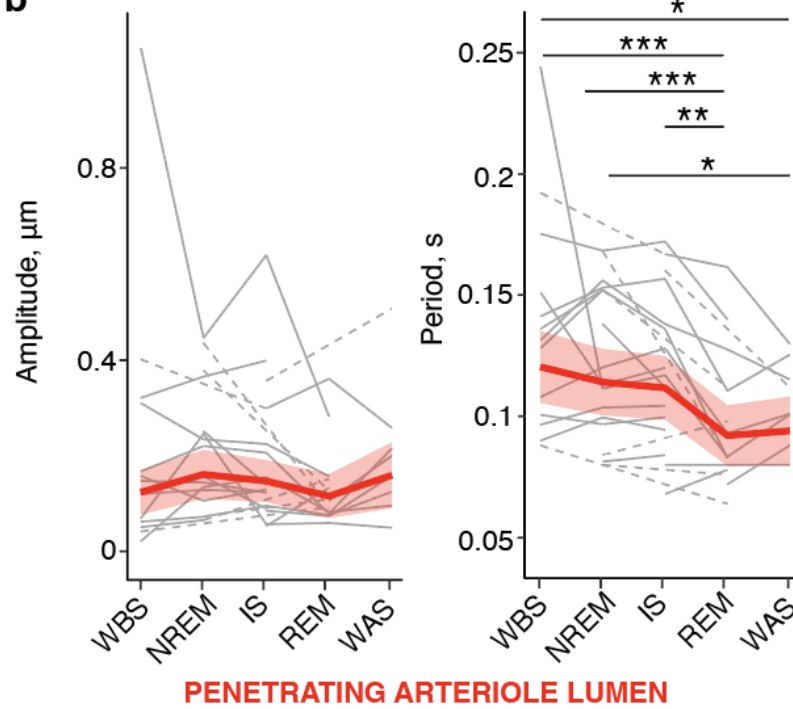



**Supplementary Fig. 17:** Amplitude and period of **a**, respiratory (1-4Hz) and **b**, cardiac (4-15Hz) frequencies of penetrating arteriole lumen throughout a sleep cycle. Gray lines represent the individual penetrating arterioles, dashed lines indicate that a particular penetrating arteriole has no observations in a certain state, bold lines and shaded area are the estimates and 95% CI from linear mixed effects models (two-sided), n=135 episodes, 22 penetrating arterioles, 4 mice for **a**, n=57 episodes, 9 penetrating arterioles, 3 mice for **b**. \* $P < 0.05$ , \*\* $P < 0.01$ , \*\*\* $P < 0.001$ , Tukey adjustment for multiple comparisons. WBS: wake before sleep; NREM: non-rapid eye movement sleep; IS: intermediate state sleep; REM: rapid eye movement sleep; WAS: wake after sleep. See end of supplementary information for exact p-values, and degrees of freedom for the statistical tests. Source data are provided as a Source Data file.



**Supplementary Fig. 18:** Period of VLF and LF oscillations in lumen of **a**, pial arteries and **b**, penetrating arterioles throughout a sleep cycle. Gray lines represent the individual vessel, dashed lines indicate that a particular vessel has no observations in a certain state, bold lines and shaded area are the estimates and 95% CI from linear mixed effects models (two-sided),  $n=310$  episodes, 25 penetrating arterioles, 4 mice for **a**,  $n=570$  episodes, 44 penetrating arterioles, 5 mice for **b**.  $*P < 0.05$ ,  $**P < 0.01$ ,  $***P < 0.001$ , Tukey adjustment for multiple comparisons. WBS: wake before sleep; NREM: non-rapid eye movement sleep; IS: intermediate state sleep; REM: rapid eye movement sleep; WAS: wake after sleep; VLF: very low frequency; LF: low frequency. See end of supplementary information for exact p-values, and degrees of freedom for the statistical tests. Source data are provided as a Source Data file.

Peak pressure (Pa)

**a** 0% obstructed PVS

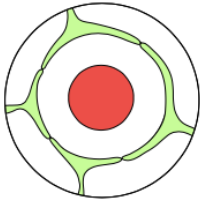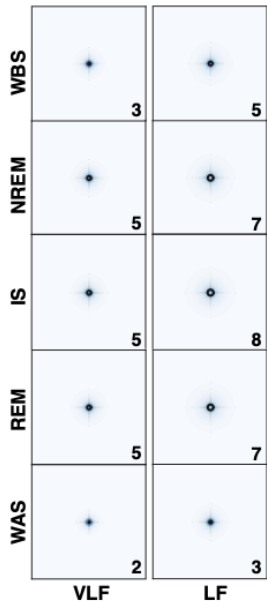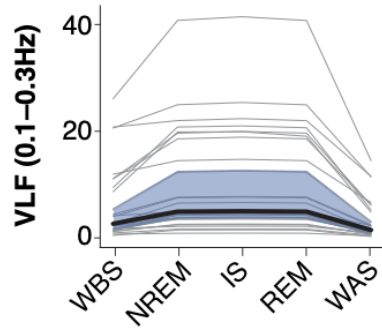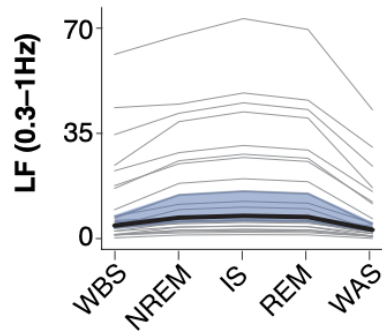

**b** 25% obstructed PVS

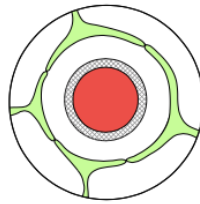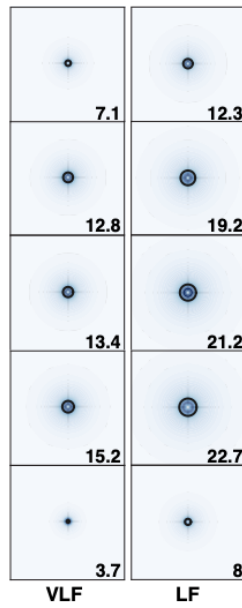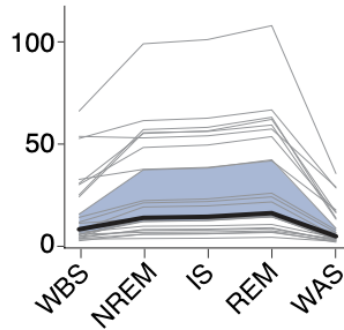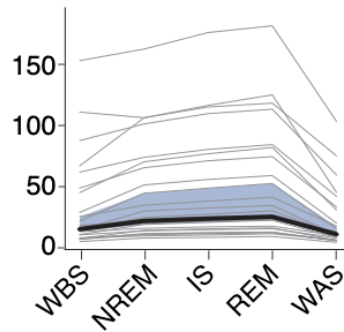

**c** 50% obstructed PVS

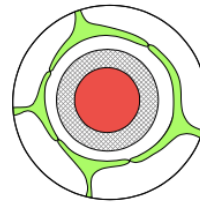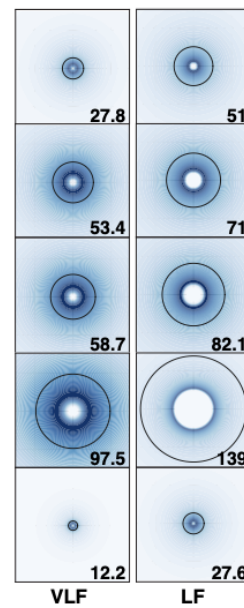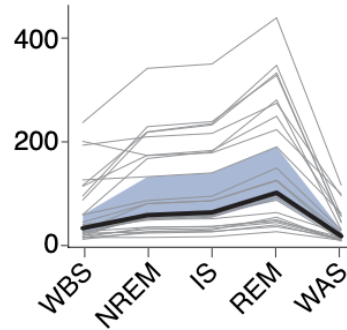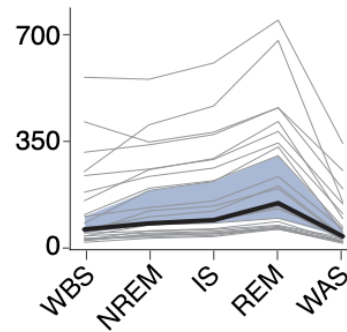

**Supplementary Fig. 19. Predicted peak pressure generated by VLF and LF oscillations across sleep-wake cycle in penetrating arteriole PVS. a-c,** Peak pressure in penetrating arteriole PVS generated by VLF and LF oscillations during a sleep cycle as predicted by biomechanical modeling using three scenarios where we added a fixed volume to the PVS obstructing flow corresponding to 0%, 25% and 50% of our measured PVS in quiet wakefulness. The black circle represents the median, whereas the shading represents the distribution of all modeled vessels. Gray lines represent observations from individual penetrating arterioles while bolded black lines with the blue shading are median values with 10<sup>th</sup> and 90<sup>th</sup> percentiles, n = 16 vessels, 4 mice. WBS: wake before sleep; NREM: non-rapid eye movement sleep; IS: intermediate state sleep; REM: rapid eye movement sleep; WAS: wake after sleep; PVS: perivascular space; VLF: very low frequency; LF: low frequency. See end of supplementary information for exact p-values, and degrees of freedom for the statistical tests. Source data are provided as a Source Data file.

## Supplementary tables

| <b>Lumen diameter</b>              | Wake before sleep | NREM       | IS         | REM         | Wake after sleep |
|------------------------------------|-------------------|------------|------------|-------------|------------------|
| VLF amplitude, $\mu\text{m}$ (%)   | 0.4 (1.8)         | 1.4 (5.9)  | 1.2 (4.9)  | 0.9 (3.1)   | 0.7 (3.2)        |
| LF amplitude, $\mu\text{m}$ (%)    | 0.3 (1.3)         | 0.6 (2.5)  | 0.6 (2.5)  | 0.3 (1.0)   | 0.3 (1.4)        |
| Median diameter, $\mu\text{m}$ (%) | 22.7              | 23.6 (4.0) | 24.4 (7.5) | 29.2 (28.6) | 21.6(-4.8)       |

**Supplementary Table 1.** Estimated values of VLF amplitude, LF amplitude and diameter of pial artery lumen during sleep states obtained from linear mixed effects models. For VLF amplitude and LF amplitude, numbers in brackets show the percentage wise change in diameter from median diameter in each sleep cycle state. For median diameter, numbers in brackets show percentage wise change in diameter from wake-before-sleep state.

| <b>Lumen diameter</b>              | Quiet wakefulness | Whisking   | Locomotion |
|------------------------------------|-------------------|------------|------------|
| VLF amplitude, $\mu\text{m}$ (%)   | 0.6 (3.3)         | 0.4 (2.2)  | 1.4 (7.4)  |
| LF amplitude, $\mu\text{m}$ (%)    | 0.3 (1.7)         | 0.3 (1.7)  | 0.7 (3.7)  |
| Median diameter, $\mu\text{m}$ (%) | 18                | 18.1 (0.6) | 19.0 (5.6) |

**Supplementary Table 2.** Estimated values of VLF amplitude, LF amplitude and diameter of pial artery lumen during wake states obtained from linear mixed effects models. For VLF amplitude and LF amplitude, numbers in brackets show the percentage wise change in diameter from median diameter in each wakefulness state. For median diameter, numbers in brackets show percentage wise change in diameter from quiet wakefulness state.

| <b>Lumen diameter</b>          | Wake before sleep | NREM       | IS          | REM         | Wake after sleep |
|--------------------------------|-------------------|------------|-------------|-------------|------------------|
| VLF amplitude, $\mu\text{m}$   | 0.4 (3.4)         | 1 (8.2)    | 0.8 (6.1)   | 0.4 (2.6)   | 0.3 (2.7)        |
| LF amplitude, $\mu\text{m}$    | 0.3 (2.5)         | 0.5 (4.1)  | 0.45 (3.4)  | 0.2 (1.3)   | 0.2 (1.8)        |
| Median diameter, $\mu\text{m}$ | 11.9              | 12.2 (2.5) | 13.2 (10.9) | 15.5 (30.3) | 11.3 (-5.0)      |

**Supplementary Table 3.** Estimated values of VLF amplitude, LF amplitude and diameter of penetrating arteriole lumen during sleep states obtained from linear mixed effects models. For VLF amplitude and LF amplitude, numbers in brackets show the percentage wise change in diameter from median diameter in each sleep cycle state. For median diameter, numbers in brackets show percentage wise change in diameter from wake-before-sleep state.

| <b>PVS total width</b>                | Wake before sleep | NREM       | IS         | REM         | Wake after sleep |
|---------------------------------------|-------------------|------------|------------|-------------|------------------|
| VLF amplitude, $\mu\text{m}$ (%)      | 0.29 (4.7)        | 0.44 (7.2) | 0.4 (7.1)  | 0.21 (4.7)  | 0.16 (2.4)       |
| LF amplitude, $\mu\text{m}$ (%)       | 0.16 (2.6)        | 0.27 (4.4) | 0.25 (4.5) | 0.11 (2.4)  | 0.14 (2.1)       |
| Median total width, $\mu\text{m}$ (%) | 6.2               | 6.1 (-1.6) | 5.6 (-9.7) | 4.5 (-27.4) | 6.8 (9.7)        |

**Supplementary Table 4.** Estimated values of VLF amplitude, LF amplitude and total width of penetrating arteriole PVS during sleep states obtained from linear mixed effects models. For VLF amplitude and LF amplitude, numbers in brackets show the percentage wise change in diameter from median diameter in each sleep cycle state. For median total width, numbers in brackets show percentage wise change in total width from wake-before-sleep state.

| <b>PVS area</b>                    | Wake before sleep | NREM      | IS         | REM         | Wake after sleep |
|------------------------------------|-------------------|-----------|------------|-------------|------------------|
| VLF amplitude, $\mu\text{m}^2$ (%) | 5 (3.4)           | 8.7 (5.9) | 7.5 (5.2)  | 4.8 (3.8)   | 3.7 (2.3)        |
| LF amplitude, $\mu\text{m}^2$ (%)  | 3.2 (2.2)         | 5.4 (3.6) | 4.8 (3.4)  | 2.2 (1.7)   | 2.8 (1.7)        |
| Median area, $\mu\text{m}^2$ (%)   | 148               | 148 (0)   | 143 (-3.4) | 126 (-14.9) | 161 (8.8)        |

**Supplementary Table 5.** Estimated values of VLF amplitude, LF amplitude and median area of penetrating arteriole PVS during sleep states obtained from linear mixed effects models. For VLF amplitude and LF amplitude, numbers in brackets show the percentage wise change in area from median area in each sleep cycle state. For the median area, numbers in brackets show percentage wise change in area from wake-before-sleep state.

| <b>Endfoot tube diameter</b>       | Wake before sleep | NREM       | IS         | REM        | Wake after sleep |
|------------------------------------|-------------------|------------|------------|------------|------------------|
| VLF amplitude, $\mu\text{m}$ (%)   | 0.19 (1.0)        | 0.37 (1.9) | 0.33 (1.7) | 0.21 (1.0) | 0.15 (0.7)       |
| LF amplitude, $\mu\text{m}$ (%)    | 0.13 (0.7)        | 0.24 (1.3) | 0.22 (1.1) | 0.1 (0.5)  | 0.13 (0.6)       |
| Median diameter, $\mu\text{m}$ (%) | 19                | 19.2 (1.1) | 19.4 (2.1) | 20.5 (7.9) | 19.2 (1.1)       |

**Supplementary Table 6.** Estimated values of VLF amplitude, LF amplitude and diameter of penetrating arteriole endfoot tube during sleep states obtained from linear mixed effects models. For VLF amplitude and LF amplitude, numbers in brackets show the percentage wise change in diameter from median diameter in each sleep cycle state. For median diameter, numbers in brackets show percentage wise change in diameter from wake-before-sleep state.



| <b>Lumen diameter</b>              | Quiet wakefulness | Whisking   | Locomotion  |
|------------------------------------|-------------------|------------|-------------|
| VLF amplitude, $\mu\text{m}$ (%)   | 0.5 (4.4)         | 0.4 (3.3)  | 0.63 (4.7)  |
| LF amplitude, $\mu\text{m}$ (%)    | 0.37 (3.2)        | 0.31 (2.5) | 0.46 (3.5)  |
| Median diameter, $\mu\text{m}$ (%) | 11.4              | 12.3 (7.9) | 13.3 (16.7) |

**Supplementary Table 7.** Estimated values of VLF amplitude, LF amplitude and diameter of penetrating arteriole lumen during wake states obtained from linear mixed effects models. For VLF amplitude and LF amplitude, numbers in brackets show the percentage wise change in diameter from median diameter in each wakefulness state. For median diameter, numbers in brackets show percentage wise change in diameter from quiet wakefulness state.

| <b>PVS total width</b>                | Quiet wakefulness | Whisking   | Locomotion  |
|---------------------------------------|-------------------|------------|-------------|
| VLF amplitude, $\mu\text{m}$ (%)      | 0.31 (4.8)        | 0.26 (4.3) | 0.57 (10.4) |
| LF amplitude, $\mu\text{m}$ (%)       | 0.23 (3.5)        | 0.24 (4.0) | 0.44 (8.0)  |
| Median total width, $\mu\text{m}$ (%) | 6.5               | 6 (-7.7)   | 5.5 (-15.4) |

**Supplementary Table 8.** Estimated values of VLF amplitude, LF amplitude and total width of penetrating arteriole PVS during wake states obtained from linear mixed effects models. For VLF amplitude and LF amplitude, numbers in brackets show the percentage wise change in total width from median total width in each wakefulness state. For total width, numbers in brackets show percentage wise change in total width from quiet wakefulness state.

| <b>PVS area</b>                    | Quiet wakefulness | Whisking   | Locomotion |
|------------------------------------|-------------------|------------|------------|
| VLF amplitude, $\mu\text{m}^2$ (%) | 5.7 (3.9)         | 5.2 (3.7)  | 10 (7.4)   |
| LF amplitude, $\mu\text{m}^2$ (%)  | 3.9 (2.6)         | 4.9 (3.5)  | 10 (7.4)   |
| Median area, $\mu\text{m}^2$ (%)   | 148               | 142 (-4.1) | 136 (-8.1) |

**Supplementary Table 9.** Estimated values of VLF amplitude, LF amplitude and median area of penetrating arteriole PVS during wake states obtained from linear mixed effects models. For VLF amplitude and LF amplitude, numbers in brackets show the percentage wise change in area from

median area in each wakefulness state. For the median area, numbers in brackets show percentage wise change in area from quiet wakefulness state.

| <b>Endfoot tube diameter</b>       | Quiet wakefulness | Whisking   | Locomotion |
|------------------------------------|-------------------|------------|------------|
| VLF amplitude, $\mu\text{m}$ (%)   | 0.13 (0.7)        | 0.18 (1.0) | 0.3 (1.6)  |
| LF amplitude, $\mu\text{m}$ (%)    | 0.13 (0.7)        | 0.14 (0.8) | 0.32 (1.7) |
| Median diameter, $\mu\text{m}$ (%) | 18.3              | 18.6 (1.6) | 19 (3.8)   |

**Supplementary Table 10.** Estimated values of VLF amplitude, LF amplitude and diameter of penetrating arteriole endfoot tube during wake states obtained from linear mixed effects models. For VLF amplitude and LF amplitude, numbers in brackets show the percentage wise change in diameter from median diameter in each wakefulness state. For median diameter, numbers in brackets show percentage wise change in diameter from quiet wakefulness state.

# STATISTICAL TEST DETAILS

## Effect sizes, degrees of freedom and p-values

**Figure 1**

### 1 d) Pial artery, VLF, amplitude

|    | contrast          | ratio | SE    | df  | t.ratio | p.value  |
|----|-------------------|-------|-------|-----|---------|----------|
| 1  | NREM / Quiet      | 3.192 | 0.351 | 551 | 10.549  | < 0.0001 |
| 2  | IS / Quiet        | 2.862 | 0.322 | 551 | 9.356   | < 0.0001 |
| 3  | IS / NREM         | 0.896 | 0.039 | 551 | -2.487  | 0.095    |
| 4  | REM / Quiet       | 2.012 | 0.365 | 551 | 3.857   | 0.001    |
| 5  | REM / NREM        | 0.630 | 0.092 | 551 | -3.152  | 0.015    |
| 6  | REM / IS          | 0.703 | 0.101 | 551 | -2.464  | 0.101    |
| 7  | Awakening / Quiet | 1.547 | 0.404 | 551 | 1.669   | 0.454    |
| 8  | Awakening / NREM  | 0.485 | 0.130 | 551 | -2.692  | 0.056    |
| 9  | Awakening / IS    | 0.541 | 0.146 | 551 | -2.278  | 0.154    |
| 10 | Awakening / REM   | 0.769 | 0.235 | 551 | -0.862  | 0.911    |

### 1 e) Pial artery, LF, amplitude

|    | contrast          | ratio | SE    | df  | t.ratio | p.value  |
|----|-------------------|-------|-------|-----|---------|----------|
| 1  | NREM / Quiet      | 2.141 | 0.134 | 560 | 12.157  | < 0.0001 |
| 2  | IS / Quiet        | 2.103 | 0.136 | 560 | 11.517  | < 0.0001 |
| 3  | IS / NREM         | 0.982 | 0.030 | 560 | -0.594  | 0.976    |
| 4  | REM / Quiet       | 0.960 | 0.124 | 560 | -0.318  | 0.998    |
| 5  | REM / NREM        | 0.448 | 0.051 | 560 | -6.999  | < 0.0001 |
| 6  | REM / IS          | 0.456 | 0.051 | 560 | -6.958  | < 0.0001 |
| 7  | Awakening / Quiet | 0.995 | 0.186 | 560 | -0.028  | 1.000    |
| 8  | Awakening / NREM  | 0.465 | 0.088 | 560 | -4.062  | 0.001    |
| 9  | Awakening / IS    | 0.473 | 0.090 | 560 | -3.950  | 0.001    |
| 10 | Awakening / REM   | 1.037 | 0.227 | 560 | 0.164   | 1.000    |

Tables in Latex format generated by Hlavac, Marek (2022). `stargazer`: Well-Formatted Regression and Summary Statistics Tables. R package version 5.2.3.  
<https://CRAN.R-project.org/package=stargazer>

## 1 f) Pial artery, median diameter

|    | contrast          | ratio | SE    | df  | t.ratio | p.value  |
|----|-------------------|-------|-------|-----|---------|----------|
| 1  | NREM / Quiet      | 1.041 | 0.011 | 562 | 3.912   | 0.001    |
| 2  | IS / Quiet        | 1.069 | 0.011 | 562 | 6.370   | < 0.0001 |
| 3  | IS / NREM         | 1.026 | 0.004 | 562 | 6.286   | < 0.0001 |
| 4  | REM / Quiet       | 1.283 | 0.031 | 562 | 10.243  | < 0.0001 |
| 5  | REM / NREM        | 1.233 | 0.028 | 562 | 9.316   | < 0.0001 |
| 6  | REM / IS          | 1.201 | 0.027 | 562 | 8.216   | < 0.0001 |
| 7  | Awakening / Quiet | 0.961 | 0.020 | 562 | -1.879  | 0.330    |
| 8  | Awakening / NREM  | 0.923 | 0.021 | 562 | -3.499  | 0.005    |
| 9  | Awakening / IS    | 0.900 | 0.021 | 562 | -4.623  | 0.00005  |
| 10 | Awakening / REM   | 0.749 | 0.024 | 562 | -9.076  | < 0.0001 |

## Figure 2

### 2 d) Penetrating arteriole, VLF, amplitude, Lumen

|    | contrast          | ratio | SE    | df  | t.ratio | p.value  |
|----|-------------------|-------|-------|-----|---------|----------|
| 1  | NREM / Quiet      | 2.214 | 0.260 | 290 | 6.757   | < 0.0001 |
| 2  | IS / Quiet        | 1.834 | 0.219 | 290 | 5.092   | < 0.0001 |
| 3  | IS / NREM         | 0.828 | 0.044 | 290 | -3.544  | 0.004    |
| 4  | REM / Quiet       | 0.807 | 0.142 | 290 | -1.216  | 0.742    |
| 5  | REM / NREM        | 0.365 | 0.050 | 290 | -7.385  | < 0.0001 |
| 6  | REM / IS          | 0.440 | 0.057 | 290 | -6.354  | < 0.0001 |
| 7  | Awakening / Quiet | 0.618 | 0.104 | 290 | -2.857  | 0.037    |
| 8  | Awakening / NREM  | 0.279 | 0.045 | 290 | -7.863  | < 0.0001 |
| 9  | Awakening / IS    | 0.337 | 0.055 | 290 | -6.641  | < 0.0001 |
| 10 | Awakening / REM   | 0.765 | 0.159 | 290 | -1.293  | 0.696    |

### 2 d) Penetrating arteriole, VLF, amplitude, PVS

|    | contrast          | ratio | SE    | df  | t.ratio | p.value  |
|----|-------------------|-------|-------|-----|---------|----------|
| 1  | NREM / Quiet      | 1.526 | 0.197 | 285 | 3.277   | 0.010    |
| 2  | IS / Quiet        | 1.385 | 0.179 | 285 | 2.528   | 0.087    |
| 3  | IS / NREM         | 0.907 | 0.055 | 285 | -1.605  | 0.495    |
| 4  | REM / Quiet       | 0.745 | 0.114 | 285 | -1.916  | 0.311    |
| 5  | REM / NREM        | 0.488 | 0.050 | 285 | -6.939  | < 0.0001 |
| 6  | REM / IS          | 0.538 | 0.048 | 285 | -6.951  | < 0.0001 |
| 7  | Awakening / Quiet | 0.559 | 0.093 | 285 | -3.487  | 0.005    |
| 8  | Awakening / NREM  | 0.366 | 0.059 | 285 | -6.286  | < 0.0001 |
| 9  | Awakening / IS    | 0.404 | 0.066 | 285 | -5.571  | < 0.0001 |
| 10 | Awakening / REM   | 0.750 | 0.139 | 285 | -1.556  | 0.527    |

## 2 e) Penetrating arteriole, median diameter, Lumen

|    | contrast          | ratio | SE    | df  | t.ratio | p.value  |
|----|-------------------|-------|-------|-----|---------|----------|
| 1  | NREM / Quiet      | 1.035 | 0.023 | 294 | 1.554   | 0.528    |
| 2  | IS / Quiet        | 1.116 | 0.023 | 294 | 5.290   | < 0.0001 |
| 3  | IS / NREM         | 1.079 | 0.012 | 294 | 6.991   | < 0.0001 |
| 4  | REM / Quiet       | 1.310 | 0.045 | 294 | 7.896   | < 0.0001 |
| 5  | REM / NREM        | 1.266 | 0.037 | 294 | 8.021   | < 0.0001 |
| 6  | REM / IS          | 1.173 | 0.033 | 294 | 5.628   | < 0.0001 |
| 7  | Awakening / Quiet | 0.952 | 0.024 | 294 | -1.929  | 0.304    |
| 8  | Awakening / NREM  | 0.920 | 0.030 | 294 | -2.598  | 0.073    |
| 9  | Awakening / IS    | 0.853 | 0.027 | 294 | -5.090  | < 0.0001 |
| 10 | Awakening / REM   | 0.727 | 0.030 | 294 | -7.755  | < 0.0001 |

## 2 e) Penetrating arteriole, median diameter, PVS

Table 1:

|    | contrast          | ratio | SE    | df  | t.ratio | p.value  |
|----|-------------------|-------|-------|-----|---------|----------|
| 1  | NREM / Quiet      | 0.979 | 0.024 | 294 | -0.853  | 0.914    |
| 2  | IS / Quiet        | 0.911 | 0.022 | 294 | -3.849  | 0.001    |
| 3  | IS / NREM         | 0.930 | 0.012 | 294 | -5.474  | < 0.0001 |
| 4  | REM / Quiet       | 0.730 | 0.034 | 294 | -6.858  | < 0.0001 |
| 5  | REM / NREM        | 0.745 | 0.031 | 294 | -7.123  | < 0.0001 |
| 6  | REM / IS          | 0.801 | 0.032 | 294 | -5.485  | < 0.0001 |
| 7  | Awakening / Quiet | 1.093 | 0.032 | 294 | 3.001   | 0.024    |
| 8  | Awakening / NREM  | 1.116 | 0.036 | 294 | 3.407   | 0.007    |
| 9  | Awakening / IS    | 1.200 | 0.038 | 294 | 5.729   | < 0.0001 |
| 10 | Awakening / REM   | 1.498 | 0.074 | 294 | 8.138   | < 0.0001 |

## Supplementary Figure 2

### a) Pial arteries, wakefulness, VLF, amplitude, Lumen

|   | contrast              | ratio | SE    | df  | t.ratio | p.value  |
|---|-----------------------|-------|-------|-----|---------|----------|
| 1 | Whisking / Quiet      | 0.768 | 0.340 | 483 | -0.596  | 0.822    |
| 2 | Locomotion / Quiet    | 2.520 | 0.360 | 483 | 6.468   | < 0.0001 |
| 3 | Locomotion / Whisking | 3.280 | 1.445 | 483 | 2.696   | 0.020    |

### b) Pial arteries, wakefulness, LF, amplitude, Lumen

|   | contrast              | ratio | SE    | df  | t.ratio | p.value  |
|---|-----------------------|-------|-------|-----|---------|----------|
| 1 | Whisking / Quiet      | 0.997 | 0.190 | 782 | -0.018  | 1.000    |
| 2 | Locomotion / Quiet    | 3.512 | 0.553 | 782 | 7.983   | < 0.0001 |
| 3 | Locomotion / Whisking | 3.524 | 0.656 | 782 | 6.765   | < 0.0001 |

### c) Pial arteries, wakefulness, median diameter, Lumen

|   | contrast              | ratio | SE    | df  | t.ratio | p.value |
|---|-----------------------|-------|-------|-----|---------|---------|
| 1 | Whisking / Quiet      | 1.003 | 0.018 | 875 | 0.184   | 0.981   |
| 2 | Locomotion / Quiet    | 1.054 | 0.018 | 875 | 3.099   | 0.006   |
| 3 | Locomotion / Whisking | 1.051 | 0.016 | 875 | 3.313   | 0.003   |

## Supplementary Figure 3

### a) Penetrating arteriole, VLF, amplitude, Endfeet

|    | contrast          | ratio | SE    | df  | t.ratio | p.value  |
|----|-------------------|-------|-------|-----|---------|----------|
| 1  | NREM / Quiet      | 1.920 | 0.175 | 292 | 7.155   | < 0.0001 |
| 2  | IS / Quiet        | 1.732 | 0.163 | 292 | 5.827   | < 0.0001 |
| 3  | IS / NREM         | 0.902 | 0.060 | 292 | -1.546  | 0.533    |
| 4  | REM / Quiet       | 1.089 | 0.162 | 292 | 0.570   | 0.979    |
| 5  | REM / NREM        | 0.567 | 0.074 | 292 | -4.320  | 0.0002   |
| 6  | REM / IS          | 0.629 | 0.078 | 292 | -3.743  | 0.002    |
| 7  | Awakening / Quiet | 0.775 | 0.111 | 292 | -1.775  | 0.390    |
| 8  | Awakening / NREM  | 0.403 | 0.053 | 292 | -6.905  | < 0.0001 |
| 9  | Awakening / IS    | 0.447 | 0.060 | 292 | -5.966  | < 0.0001 |
| 10 | Awakening / REM   | 0.711 | 0.126 | 292 | -1.929  | 0.304    |

**b) Penetrating arteriole, median diameter, Endfeet**

|    | contrast          | ratio | SE    | df  | t.ratio | p.value  |
|----|-------------------|-------|-------|-----|---------|----------|
| 1  | NREM / Quiet      | 1.010 | 0.006 | 294 | 1.778   | 0.388    |
| 2  | IS / Quiet        | 1.025 | 0.006 | 294 | 4.301   | 0.0002   |
| 3  | IS / NREM         | 1.014 | 0.003 | 294 | 4.902   | < 0.0001 |
| 4  | REM / Quiet       | 1.081 | 0.017 | 294 | 5.112   | < 0.0001 |
| 5  | REM / NREM        | 1.070 | 0.016 | 294 | 4.654   | < 0.0001 |
| 6  | REM / IS          | 1.055 | 0.015 | 294 | 3.730   | 0.002    |
| 7  | Awakening / Quiet | 1.013 | 0.011 | 294 | 1.106   | 0.803    |
| 8  | Awakening / NREM  | 1.002 | 0.012 | 294 | 0.176   | 1.000    |
| 9  | Awakening / IS    | 0.988 | 0.012 | 294 | -0.968  | 0.869    |
| 10 | Awakening / REM   | 0.936 | 0.017 | 294 | -3.617  | 0.003    |

**Supplementary Figure 4**

**a) Penetrating arteriole, LF, amplitude, Endfeet**

|    | contrast          | ratio | SE    | df  | t.ratio | p.value  |
|----|-------------------|-------|-------|-----|---------|----------|
| 1  | NREM / Quiet      | 1.823 | 0.202 | 295 | 5.409   | < 0.0001 |
| 2  | IS / Quiet        | 1.682 | 0.187 | 295 | 4.667   | < 0.0001 |
| 3  | IS / NREM         | 0.923 | 0.036 | 295 | -2.081  | 0.231    |
| 4  | REM / Quiet       | 0.785 | 0.135 | 295 | -1.409  | 0.622    |
| 5  | REM / NREM        | 0.431 | 0.058 | 295 | -6.207  | < 0.0001 |
| 6  | REM / IS          | 0.467 | 0.061 | 295 | -5.803  | < 0.0001 |
| 7  | Awakening / Quiet | 0.984 | 0.138 | 295 | -0.118  | 1.000    |
| 8  | Awakening / NREM  | 0.540 | 0.064 | 295 | -5.189  | < 0.0001 |
| 9  | Awakening / IS    | 0.585 | 0.071 | 295 | -4.439  | < 0.0001 |
| 10 | Awakening / REM   | 1.253 | 0.225 | 295 | 1.251   | 0.721    |

**b) Penetrating arteriole, LF, amplitude, Lumen**

|    | contrast          | ratio | SE    | df  | t.ratio | p.value  |
|----|-------------------|-------|-------|-----|---------|----------|
| 1  | NREM / Quiet      | 1.853 | 0.177 | 292 | 6.444   | < 0.0001 |
| 2  | IS / Quiet        | 1.669 | 0.161 | 292 | 5.297   | < 0.0001 |
| 3  | IS / NREM         | 0.901 | 0.038 | 292 | -2.479  | 0.098    |
| 4  | REM / Quiet       | 0.611 | 0.089 | 292 | -3.362  | 0.008    |
| 5  | REM / NREM        | 0.330 | 0.038 | 292 | -9.585  | < 0.0001 |
| 6  | REM / IS          | 0.366 | 0.039 | 292 | -9.424  | < 0.0001 |
| 7  | Awakening / Quiet | 0.811 | 0.121 | 292 | -1.400  | 0.628    |
| 8  | Awakening / NREM  | 0.438 | 0.059 | 292 | -6.128  | < 0.0001 |
| 9  | Awakening / IS    | 0.486 | 0.065 | 292 | -5.362  | < 0.0001 |
| 10 | Awakening / REM   | 1.327 | 0.224 | 292 | 1.679   | 0.449    |

c) Penetrating arteriole, LF, amplitude, PVS

|    | contrast          | ratio | SE    | df  | t.ratio | p.value  |
|----|-------------------|-------|-------|-----|---------|----------|
| 1  | NREM / Quiet      | 1.681 | 0.172 | 292 | 5.058   | < 0.0001 |
| 2  | IS / Quiet        | 1.535 | 0.162 | 292 | 4.052   | 0.001    |
| 3  | IS / NREM         | 0.914 | 0.039 | 292 | -2.144  | 0.205    |
| 4  | REM / Quiet       | 0.677 | 0.095 | 292 | -2.778  | 0.046    |
| 5  | REM / NREM        | 0.403 | 0.041 | 292 | -8.983  | < 0.0001 |
| 6  | REM / IS          | 0.441 | 0.041 | 292 | -8.739  | < 0.0001 |
| 7  | Awakening / Quiet | 0.849 | 0.131 | 292 | -1.065  | 0.824    |
| 8  | Awakening / NREM  | 0.505 | 0.074 | 292 | -4.662  | < 0.0001 |
| 9  | Awakening / IS    | 0.553 | 0.082 | 292 | -3.989  | 0.001    |
| 10 | Awakening / REM   | 1.255 | 0.220 | 292 | 1.293   | 0.696    |

Supplementary Figure 5

a) Penetrating arteriole, median area

|    | contrast          | ratio | SE    | df  | t.ratio | p.value  |
|----|-------------------|-------|-------|-----|---------|----------|
| 1  | NREM / Quiet      | 1.003 | 0.018 | 294 | 0.145   | 1.000    |
| 2  | IS / Quiet        | 0.965 | 0.017 | 294 | -2.012  | 0.263    |
| 3  | IS / NREM         | 0.962 | 0.011 | 294 | -3.417  | 0.006    |
| 4  | REM / Quiet       | 0.851 | 0.037 | 294 | -3.737  | 0.002    |
| 5  | REM / NREM        | 0.848 | 0.035 | 294 | -4.024  | 0.001    |
| 6  | REM / IS          | 0.882 | 0.036 | 294 | -3.116  | 0.017    |
| 7  | Awakening / Quiet | 1.089 | 0.033 | 294 | 2.849   | 0.038    |
| 8  | Awakening / NREM  | 1.087 | 0.032 | 294 | 2.854   | 0.037    |
| 9  | Awakening / IS    | 1.129 | 0.033 | 294 | 4.178   | 0.0004   |
| 10 | Awakening / REM   | 1.281 | 0.061 | 294 | 5.203   | < 0.0001 |

b) Penetrating arteriole, LF, amplitude area

|    | contrast          | ratio | SE    | df  | t.ratio | p.value  |
|----|-------------------|-------|-------|-----|---------|----------|
| 1  | NREM / Quiet      | 1.666 | 0.172 | 292 | 4.952   | < 0.0001 |
| 2  | IS / Quiet        | 1.471 | 0.152 | 292 | 3.724   | 0.002    |
| 3  | IS / NREM         | 0.883 | 0.038 | 292 | -2.879  | 0.034    |
| 4  | REM / Quiet       | 0.688 | 0.090 | 292 | -2.857  | 0.037    |
| 5  | REM / NREM        | 0.413 | 0.038 | 292 | -9.642  | < 0.0001 |
| 6  | REM / IS          | 0.467 | 0.040 | 292 | -8.975  | < 0.0001 |
| 7  | Awakening / Quiet | 0.889 | 0.138 | 292 | -0.758  | 0.942    |
| 8  | Awakening / NREM  | 0.534 | 0.073 | 292 | -4.601  | 0.0001   |
| 9  | Awakening / IS    | 0.604 | 0.084 | 292 | -3.616  | 0.003    |
| 10 | Awakening / REM   | 1.293 | 0.210 | 292 | 1.579   | 0.512    |



c) Penetrating arteriole, VLF, amplitude area

|    | contrast          | ratio | SE    | df  | t.ratio | p.value  |
|----|-------------------|-------|-------|-----|---------|----------|
| 1  | NREM / Quiet      | 1.720 | 0.234 | 289 | 3.981   | 0.001    |
| 2  | IS / Quiet        | 1.480 | 0.205 | 289 | 2.833   | 0.039    |
| 3  | IS / NREM         | 0.860 | 0.051 | 289 | -2.526  | 0.088    |
| 4  | REM / Quiet       | 0.950 | 0.169 | 289 | -0.291  | 0.998    |
| 5  | REM / NREM        | 0.552 | 0.070 | 289 | -4.657  | < 0.0001 |
| 6  | REM / IS          | 0.642 | 0.076 | 289 | -3.730  | 0.002    |
| 7  | Awakening / Quiet | 0.740 | 0.157 | 289 | -1.418  | 0.617    |
| 8  | Awakening / NREM  | 0.430 | 0.084 | 289 | -4.297  | 0.0002   |
| 9  | Awakening / IS    | 0.500 | 0.100 | 289 | -3.470  | 0.005    |
| 10 | Awakening / REM   | 0.779 | 0.180 | 289 | -1.077  | 0.818    |

## Supplementary Figure 6

a) Penetrating arteriole, wakefulness, VLF, amplitude

Endfeet

|   | contrast              | ratio | SE    | df  | t.ratio | p.value  |
|---|-----------------------|-------|-------|-----|---------|----------|
| 1 | Whisking / Quiet      | 1.378 | 1.037 | 114 | 0.426   | 0.905    |
| 2 | Locomotion / Quiet    | 2.274 | 0.347 | 114 | 5.382   | < 0.0001 |
| 3 | Locomotion / Whisking | 1.650 | 1.236 | 114 | 0.669   | 0.782    |

Lumen

|   | contrast              | ratio | SE    | df  | t.ratio | p.value |
|---|-----------------------|-------|-------|-----|---------|---------|
| 1 | Whisking / Quiet      | 0.822 | 0.160 | 114 | -1.009  | 0.573   |
| 2 | Locomotion / Quiet    | 1.283 | 0.256 | 114 | 1.248   | 0.428   |
| 3 | Locomotion / Whisking | 1.561 | 0.346 | 114 | 2.011   | 0.114   |

PVS

|   | contrast              | ratio | SE    | df  | t.ratio | p.value  |
|---|-----------------------|-------|-------|-----|---------|----------|
| 1 | Whisking / Quiet      | 0.822 | 0.095 | 123 | -1.698  | 0.210    |
| 2 | Locomotion / Quiet    | 1.820 | 0.209 | 123 | 5.210   | < 0.0001 |
| 3 | Locomotion / Whisking | 2.215 | 0.286 | 123 | 6.160   | < 0.0001 |

**b) Penetrating arteriole, wakefulness, LF, amplitude**

Endfeet

|   | contrast              | ratio | SE    | df  | t.ratio | p.value  |
|---|-----------------------|-------|-------|-----|---------|----------|
| 1 | Whisking / Quiet      | 1.094 | 0.184 | 225 | 0.536   | 0.854    |
| 2 | Locomotion / Quiet    | 2.467 | 0.217 | 225 | 10.283  | < 0.0001 |
| 3 | Locomotion / Whisking | 2.254 | 0.385 | 225 | 4.760   | < 0.0001 |

Lumen

|   | contrast              | ratio | SE    | df  | t.ratio | p.value |
|---|-----------------------|-------|-------|-----|---------|---------|
| 1 | Whisking / Quiet      | 0.844 | 0.162 | 215 | -0.882  | 0.652   |
| 2 | Locomotion / Quiet    | 1.241 | 0.200 | 215 | 1.340   | 0.375   |
| 3 | Locomotion / Whisking | 1.469 | 0.239 | 215 | 2.361   | 0.050   |

PVS

|   | contrast              | ratio | SE    | df  | t.ratio | p.value  |
|---|-----------------------|-------|-------|-----|---------|----------|
| 1 | Whisking / Quiet      | 1.065 | 0.178 | 231 | 0.375   | 0.925    |
| 2 | Locomotion / Quiet    | 1.942 | 0.241 | 231 | 5.343   | < 0.0001 |
| 3 | Locomotion / Whisking | 1.824 | 0.272 | 231 | 4.024   | 0.0002   |

**c) Penetrating arteriole, wakefulness, median diameter**

Endfeet

|   | contrast              | ratio | SE    | df  | t.ratio | p.value  |
|---|-----------------------|-------|-------|-----|---------|----------|
| 1 | Whisking / Quiet      | 1.014 | 0.010 | 251 | 1.387   | 0.349    |
| 2 | Locomotion / Quiet    | 1.041 | 0.009 | 251 | 4.699   | < 0.0001 |
| 3 | Locomotion / Whisking | 1.026 | 0.007 | 251 | 4.055   | 0.0002   |

Lumen

|   | contrast              | ratio | SE    | df  | t.ratio | p.value  |
|---|-----------------------|-------|-------|-----|---------|----------|
| 1 | Whisking / Quiet      | 1.071 | 0.031 | 251 | 2.382   | 0.047    |
| 2 | Locomotion / Quiet    | 1.167 | 0.027 | 251 | 6.673   | < 0.0001 |
| 3 | Locomotion / Whisking | 1.090 | 0.022 | 251 | 4.334   | < 0.0001 |

PVS

|   | contrast              | ratio | SE    | df  | t.ratio | p.value  |
|---|-----------------------|-------|-------|-----|---------|----------|
| 1 | Whisking / Quiet      | 0.917 | 0.034 | 251 | -2.334  | 0.053    |
| 2 | Locomotion / Quiet    | 0.841 | 0.027 | 251 | -5.453  | < 0.0001 |
| 3 | Locomotion / Whisking | 0.917 | 0.023 | 251 | -3.398  | 0.002    |

#### d) Penetrating arteriole, wakefulness, PVS area

VLF

|   | contrast              | ratio | SE    | df  | t.ratio | p.value  |
|---|-----------------------|-------|-------|-----|---------|----------|
| 1 | Whisking / Quiet      | 0.907 | 0.187 | 123 | -0.475  | 0.883    |
| 2 | Locomotion / Quiet    | 1.829 | 0.240 | 123 | 4.611   | < 0.0001 |
| 3 | Locomotion / Whisking | 2.017 | 0.439 | 123 | 3.225   | 0.005    |

LF

|   | contrast              | ratio | SE    | df  | t.ratio | p.value  |
|---|-----------------------|-------|-------|-----|---------|----------|
| 1 | Whisking / Quiet      | 1.230 | 0.173 | 230 | 1.472   | 0.306    |
| 2 | Locomotion / Quiet    | 2.563 | 0.289 | 230 | 8.344   | < 0.0001 |
| 3 | Locomotion / Whisking | 2.084 | 0.281 | 230 | 5.440   | < 0.0001 |

Median area

|   | contrast              | ratio | SE    | df  | t.ratio | p.value |
|---|-----------------------|-------|-------|-----|---------|---------|
| 1 | Whisking / Quiet      | 0.955 | 0.031 | 251 | -1.431  | 0.327   |
| 2 | Locomotion / Quiet    | 0.914 | 0.026 | 251 | -3.178  | 0.005   |
| 3 | Locomotion / Whisking | 0.957 | 0.020 | 251 | -2.146  | 0.083   |

## Supplementary Figure 7

### a) Veins, VLF, amplitude

Endfeet

|    | contrast          | ratio | SE    | df | t.ratio | p.value |
|----|-------------------|-------|-------|----|---------|---------|
| 1  | NREM / Quiet      | 1.480 | 0.268 | 76 | 2.161   | 0.206   |
| 2  | IS / Quiet        | 1.234 | 0.220 | 76 | 1.176   | 0.765   |
| 3  | IS / NREM         | 0.834 | 0.100 | 76 | -1.523  | 0.551   |
| 4  | REM / Quiet       | 1.237 | 0.272 | 76 | 0.968   | 0.869   |
| 5  | REM / NREM        | 0.836 | 0.155 | 76 | -0.964  | 0.870   |
| 6  | REM / IS          | 1.003 | 0.183 | 76 | 0.016   | 1       |
| 7  | Awakening / Quiet | 0.906 | 0.303 | 76 | -0.294  | 0.998   |
| 8  | Awakening / NREM  | 0.613 | 0.211 | 76 | -1.421  | 0.616   |
| 9  | Awakening / IS    | 0.735 | 0.250 | 76 | -0.904  | 0.894   |
| 10 | Awakening / REM   | 0.733 | 0.275 | 76 | -0.830  | 0.921   |

Lumen

|    | contrast          | ratio | SE    | df | t.ratio | p.value |
|----|-------------------|-------|-------|----|---------|---------|
| 1  | NREM / Quiet      | 1.465 | 0.281 | 75 | 1.989   | 0.281   |
| 2  | IS / Quiet        | 1.020 | 0.184 | 75 | 0.112   | 1.000   |
| 3  | IS / NREM         | 0.696 | 0.076 | 75 | -3.305  | 0.012   |
| 4  | REM / Quiet       | 0.980 | 0.225 | 75 | -0.090  | 1.000   |
| 5  | REM / NREM        | 0.669 | 0.161 | 75 | -1.670  | 0.458   |
| 6  | REM / IS          | 0.960 | 0.217 | 75 | -0.181  | 1.000   |
| 7  | Awakening / Quiet | 0.756 | 0.244 | 75 | -0.869  | 0.907   |
| 8  | Awakening / NREM  | 0.516 | 0.153 | 75 | -2.229  | 0.180   |
| 9  | Awakening / IS    | 0.741 | 0.214 | 75 | -1.037  | 0.837   |
| 10 | Awakening / REM   | 0.772 | 0.264 | 75 | -0.757  | 0.942   |

PVS

|    | contrast          | ratio | SE    | df | t.ratio | p.value |
|----|-------------------|-------|-------|----|---------|---------|
| 1  | NREM / Quiet      | 1.395 | 0.244 | 73 | 1.903   | 0.325   |
| 2  | IS / Quiet        | 1.243 | 0.217 | 73 | 1.248   | 0.724   |
| 3  | IS / NREM         | 0.891 | 0.096 | 73 | -1.068  | 0.822   |
| 4  | REM / Quiet       | 1.151 | 0.291 | 73 | 0.555   | 0.981   |
| 5  | REM / NREM        | 0.825 | 0.193 | 73 | -0.822  | 0.923   |
| 6  | REM / IS          | 0.925 | 0.204 | 73 | -0.352  | 0.997   |
| 7  | Awakening / Quiet | 0.879 | 0.336 | 73 | -0.337  | 0.997   |
| 8  | Awakening / NREM  | 0.630 | 0.230 | 73 | -1.268  | 0.711   |
| 9  | Awakening / IS    | 0.707 | 0.255 | 73 | -0.963  | 0.871   |
| 10 | Awakening / REM   | 0.764 | 0.308 | 73 | -0.667  | 0.963   |

## b) Veins, LF, amplitude

Endfeet

|    | contrast          | ratio | SE    | df | t.ratio | p.value |
|----|-------------------|-------|-------|----|---------|---------|
| 1  | NREM / Quiet      | 1.101 | 0.184 | 77 | 0.572   | 0.979   |
| 2  | IS / Quiet        | 1.015 | 0.172 | 77 | 0.087   | 1.000   |
| 3  | IS / NREM         | 0.922 | 0.076 | 77 | -0.986  | 0.861   |
| 4  | REM / Quiet       | 0.718 | 0.136 | 77 | -1.750  | 0.410   |
| 5  | REM / NREM        | 0.652 | 0.086 | 77 | -3.235  | 0.015   |
| 6  | REM / IS          | 0.707 | 0.097 | 77 | -2.524  | 0.096   |
| 7  | Awakening / Quiet | 1.311 | 0.358 | 77 | 0.991   | 0.859   |
| 8  | Awakening / NREM  | 1.191 | 0.347 | 77 | 0.599   | 0.975   |
| 9  | Awakening / IS    | 1.292 | 0.374 | 77 | 0.883   | 0.902   |
| 10 | Awakening / REM   | 1.826 | 0.566 | 77 | 1.944   | 0.303   |

Lumen

|    | contrast          | ratio | SE    | df | t.ratio | p.value |
|----|-------------------|-------|-------|----|---------|---------|
| 1  | NREM / Quiet      | 1.167 | 0.112 | 77 | 1.608   | 0.497   |
| 2  | IS / Quiet        | 1.084 | 0.104 | 77 | 0.841   | 0.917   |
| 3  | IS / NREM         | 0.928 | 0.069 | 77 | -1.008  | 0.851   |
| 4  | REM / Quiet       | 0.832 | 0.106 | 77 | -1.450  | 0.598   |
| 5  | REM / NREM        | 0.712 | 0.088 | 77 | -2.743  | 0.057   |
| 6  | REM / IS          | 0.767 | 0.096 | 77 | -2.108  | 0.227   |
| 7  | Awakening / Quiet | 0.619 | 0.128 | 77 | -2.325  | 0.148   |
| 8  | Awakening / NREM  | 0.531 | 0.108 | 77 | -3.125  | 0.021   |
| 9  | Awakening / IS    | 0.572 | 0.115 | 77 | -2.789  | 0.051   |
| 10 | Awakening / REM   | 0.745 | 0.164 | 77 | -1.336  | 0.670   |

PVS

|    | contrast          | ratio | SE    | df | t.ratio | p.value |
|----|-------------------|-------|-------|----|---------|---------|
| 1  | NREM / Quiet      | 0.946 | 0.168 | 73 | -0.311  | 0.998   |
| 2  | IS / Quiet        | 0.806 | 0.144 | 73 | -1.205  | 0.748   |
| 3  | IS / NREM         | 0.852 | 0.055 | 73 | -2.483  | 0.106   |
| 4  | REM / Quiet       | 0.687 | 0.130 | 73 | -1.988  | 0.282   |
| 5  | REM / NREM        | 0.726 | 0.067 | 73 | -3.492  | 0.007   |
| 6  | REM / IS          | 0.853 | 0.083 | 73 | -1.644  | 0.475   |
| 7  | Awakening / Quiet | 1.019 | 0.138 | 73 | 0.141   | 1.000   |
| 8  | Awakening / NREM  | 1.077 | 0.212 | 73 | 0.377   | 0.996   |
| 9  | Awakening / IS    | 1.265 | 0.250 | 73 | 1.190   | 0.757   |
| 10 | Awakening / REM   | 1.483 | 0.309 | 73 | 1.891   | 0.331   |

### c) Veins, median diameter

Endfeet

|    | contrast          | ratio | SE    | df | t.ratio | p.value |
|----|-------------------|-------|-------|----|---------|---------|
| 1  | NREM / Quiet      | 1.010 | 0.013 | 75 | 0.783   | 0.935   |
| 2  | IS / Quiet        | 1.026 | 0.014 | 75 | 1.893   | 0.330   |
| 3  | IS / NREM         | 1.016 | 0.006 | 75 | 2.521   | 0.097   |
| 4  | REM / Quiet       | 1.003 | 0.020 | 75 | 0.172   | 1.000   |
| 5  | REM / NREM        | 0.993 | 0.015 | 75 | -0.449  | 0.991   |
| 6  | REM / IS          | 0.978 | 0.015 | 75 | -1.458  | 0.593   |
| 7  | Awakening / Quiet | 0.980 | 0.015 | 75 | -1.343  | 0.665   |
| 8  | Awakening / NREM  | 0.970 | 0.018 | 75 | -1.610  | 0.496   |
| 9  | Awakening / IS    | 0.955 | 0.019 | 75 | -2.384  | 0.131   |
| 10 | Awakening / REM   | 0.976 | 0.024 | 75 | -0.981  | 0.863   |

Lumen

|    | contrast          | ratio | SE    | df | t.ratio | p.value |
|----|-------------------|-------|-------|----|---------|---------|
| 1  | NREM / Quiet      | 1.030 | 0.020 | 75 | 1.529   | 0.547   |
| 2  | IS / Quiet        | 1.054 | 0.019 | 75 | 2.939   | 0.034   |
| 3  | IS / NREM         | 1.023 | 0.011 | 75 | 2.225   | 0.182   |
| 4  | REM / Quiet       | 0.952 | 0.028 | 75 | -1.652  | 0.470   |
| 5  | REM / NREM        | 0.925 | 0.023 | 75 | -3.188  | 0.017   |
| 6  | REM / IS          | 0.904 | 0.021 | 75 | -4.340  | 0.0004  |
| 7  | Awakening / Quiet | 0.998 | 0.031 | 75 | -0.062  | 1.000   |
| 8  | Awakening / NREM  | 0.969 | 0.032 | 75 | -0.953  | 0.875   |
| 9  | Awakening / IS    | 0.947 | 0.030 | 75 | -1.694  | 0.444   |
| 10 | Awakening / REM   | 1.048 | 0.041 | 75 | 1.205   | 0.748   |

PVS

|    | contrast          | ratio | SE    | df | t.ratio | p.value |
|----|-------------------|-------|-------|----|---------|---------|
| 1  | NREM / Quiet      | 0.966 | 0.076 | 75 | -0.446  | 0.992   |
| 2  | IS / Quiet        | 0.948 | 0.074 | 75 | -0.688  | 0.958   |
| 3  | IS / NREM         | 0.982 | 0.021 | 75 | -0.861  | 0.910   |
| 4  | REM / Quiet       | 0.881 | 0.082 | 75 | -1.374  | 0.646   |
| 5  | REM / NREM        | 0.912 | 0.047 | 75 | -1.771  | 0.398   |
| 6  | REM / IS          | 0.929 | 0.048 | 75 | -1.435  | 0.607   |
| 7  | Awakening / Quiet | 0.812 | 0.101 | 75 | -1.671  | 0.458   |
| 8  | Awakening / NREM  | 0.841 | 0.119 | 75 | -1.220  | 0.740   |
| 9  | Awakening / IS    | 0.857 | 0.121 | 75 | -1.092  | 0.810   |
| 10 | Awakening / REM   | 0.922 | 0.138 | 75 | -0.539  | 0.983   |

## Supplementary Figure 8

### b) 0.1–0.3 Hz power, $\mu\text{m}^2$

Endfoot

|   | contrast     | p. value |
|---|--------------|----------|
| 1 | NREM / IS    | 0.112    |
| 2 | NREM / REM   | 0.016    |
| 3 | NREM / quiet | 0.017    |
| 4 | IS / REM     | 0.058    |
| 5 | IS / quiet   | 0.372    |
| 6 | REM / quiet  | 0.338    |

Lumen

|   | contrast     | p. value |
|---|--------------|----------|
| 1 | NREM / IS    | 0.081    |
| 2 | NREM / REM   | 0.072    |
| 3 | NREM / quiet | 0.02     |
| 4 | IS / REM     | 0.175    |
| 5 | IS / quiet   | 0.282    |
| 6 | REM / quiet  | 0.422    |

PVS

|   | contrast     | p. value |
|---|--------------|----------|
| 1 | NREM / IS    | 0.34     |
| 2 | NREM / REM   | 0.038    |
| 3 | NREM / quiet | 0.017    |
| 4 | IS / REM     | 0.267    |
| 5 | IS / quiet   | 0.453    |
| 6 | REM / quiet  | 0.516    |

### c) Change in diameter, $\mu\text{m}$

Endfoot

|   | contrast     | p. value |
|---|--------------|----------|
| 1 | NREM / IS    | 0.012    |
| 2 | NREM / REM   | <0.0001  |
| 3 | NREM / quiet | 0.035    |
| 4 | IS / REM     | <0.0001  |
| 5 | IS / quiet   | 0.0006   |
| 6 | REM / quiet  | <0.0001  |

Lumen

|   | contrast     | p. value |
|---|--------------|----------|
| 1 | NREM / IS    | 0.029    |
| 2 | NREM / REM   | <0.0001  |
| 3 | NREM / quiet | 0.015    |
| 4 | IS / REM     | <0.0001  |
| 5 | IS / quiet   | 0.0005   |
| 6 | REM / quiet  | <0.0001  |

PVS

|   | contrast     | p. value |
|---|--------------|----------|
| 1 | NREM / IS    | 0.066    |
| 2 | NREM / REM   | <0.0001  |
| 3 | NREM / quiet | 0.11     |
| 4 | IS / REM     | <0.0001  |
| 5 | IS / quiet   | 0.0006   |
| 6 | REM / quiet  | <0.0001  |



## Supplementary Figure 16

### a) Pial artery, respiratory, Lumen

Amplitude

|    | contrast          | ratio | SE    | df  | t.ratio | p.value |
|----|-------------------|-------|-------|-----|---------|---------|
| 1  | NREM / Quiet      | 1.091 | 0.085 | 324 | 1.118   | 0.797   |
| 2  | IS / Quiet        | 1.031 | 0.084 | 324 | 0.372   | 0.996   |
| 3  | IS / NREM         | 0.945 | 0.038 | 324 | -1.400  | 0.628   |
| 4  | REM / Quiet       | 0.812 | 0.100 | 324 | -1.697  | 0.437   |
| 5  | REM / NREM        | 0.744 | 0.074 | 324 | -2.986  | 0.025   |
| 6  | REM / IS          | 0.787 | 0.079 | 324 | -2.385  | 0.122   |
| 7  | Awakening / Quiet | 1.251 | 0.150 | 324 | 1.861   | 0.341   |
| 8  | Awakening / NREM  | 1.147 | 0.115 | 324 | 1.361   | 0.653   |
| 9  | Awakening / IS    | 1.214 | 0.124 | 324 | 1.891   | 0.324   |
| 10 | Awakening / REM   | 1.541 | 0.208 | 324 | 3.211   | 0.013   |

Period

|    | contrast          | ratio | SE    | df  | t.ratio | p.value |
|----|-------------------|-------|-------|-----|---------|---------|
| 1  | NREM / Quiet      | 1.055 | 0.041 | 324 | 1.380   | 0.641   |
| 2  | IS / Quiet        | 1.004 | 0.041 | 324 | 0.111   | 1.000   |
| 3  | IS / NREM         | 0.953 | 0.025 | 324 | -1.887  | 0.326   |
| 4  | REM / Quiet       | 0.921 | 0.072 | 324 | -1.057  | 0.828   |
| 5  | REM / NREM        | 0.873 | 0.061 | 324 | -1.952  | 0.292   |
| 6  | REM / IS          | 0.917 | 0.064 | 324 | -1.252  | 0.721   |
| 7  | Awakening / Quiet | 1.020 | 0.054 | 324 | 0.370   | 0.996   |
| 8  | Awakening / NREM  | 0.967 | 0.047 | 324 | -0.694  | 0.958   |
| 9  | Awakening / IS    | 1.015 | 0.050 | 324 | 0.308   | 0.998   |
| 10 | Awakening / REM   | 1.108 | 0.088 | 324 | 1.289   | 0.698   |

### b) Pial artery, cardiac, Lumen

Amplitude

|    | contrast          | ratio | SE    | df  | t.ratio | p.value |
|----|-------------------|-------|-------|-----|---------|---------|
| 1  | NREM / Quiet      | 1.051 | 0.040 | 472 | 1.328   | 0.674   |
| 2  | IS / Quiet        | 1.094 | 0.041 | 472 | 2.386   | 0.121   |
| 3  | IS / NREM         | 1.041 | 0.024 | 472 | 1.768   | 0.393   |
| 4  | REM / Quiet       | 1.040 | 0.110 | 472 | 0.369   | 0.996   |
| 5  | REM / NREM        | 0.989 | 0.100 | 472 | -0.109  | 1.000   |
| 6  | REM / IS          | 0.950 | 0.094 | 472 | -0.513  | 0.986   |
| 7  | Awakening / Quiet | 1.019 | 0.085 | 472 | 0.229   | 0.999   |
| 8  | Awakening / NREM  | 0.969 | 0.076 | 472 | -0.394  | 0.995   |
| 9  | Awakening / IS    | 0.931 | 0.074 | 472 | -0.901  | 0.896   |
| 10 | Awakening / REM   | 0.980 | 0.124 | 472 | -0.159  | 1.000   |

Period

|    | contrast          | ratio | SE    | df  | t.ratio | p.value |
|----|-------------------|-------|-------|-----|---------|---------|
| 1  | NREM / Quiet      | 1.037 | 0.017 | 468 | 2.258   | 0.161   |
| 2  | IS / Quiet        | 1.057 | 0.017 | 468 | 3.414   | 0.006   |
| 3  | IS / NREM         | 1.020 | 0.008 | 468 | 2.469   | 0.099   |
| 4  | REM / Quiet       | 0.911 | 0.035 | 468 | -2.419  | 0.112   |
| 5  | REM / NREM        | 0.879 | 0.031 | 468 | -3.614  | 0.003   |
| 6  | REM / IS          | 0.861 | 0.030 | 468 | -4.244  | 0.0003  |
| 7  | Awakening / Quiet | 0.955 | 0.041 | 468 | -1.074  | 0.820   |
| 8  | Awakening / NREM  | 0.922 | 0.039 | 468 | -1.946  | 0.295   |
| 9  | Awakening / IS    | 0.904 | 0.038 | 468 | -2.420  | 0.112   |
| 10 | Awakening / REM   | 1.049 | 0.055 | 468 | 0.908   | 0.894   |

## Supplementary Figure 17

### a) Penetrating arteriole, respiratory, Lumen

Amplitude

|    | contrast          | ratio | SE    | df | t.ratio | p.value |
|----|-------------------|-------|-------|----|---------|---------|
| 1  | NREM / Quiet      | 1.144 | 0.395 | 50 | 0.389   | 0.995   |
| 2  | IS / Quiet        | 1.227 | 0.401 | 50 | 0.627   | 0.970   |
| 3  | IS / NREM         | 1.073 | 0.259 | 50 | 0.292   | 0.998   |
| 4  | REM / Quiet       | 1.488 | 0.584 | 50 | 1.013   | 0.848   |
| 5  | REM / NREM        | 1.301 | 0.445 | 50 | 0.770   | 0.938   |
| 6  | REM / IS          | 1.212 | 0.409 | 50 | 0.571   | 0.979   |
| 7  | Awakening / Quiet | 1.956 | 1.006 | 50 | 1.304   | 0.690   |
| 8  | Awakening / NREM  | 1.710 | 0.816 | 50 | 1.124   | 0.793   |
| 9  | Awakening / IS    | 1.593 | 0.739 | 50 | 1.005   | 0.852   |
| 10 | Awakening / REM   | 1.314 | 0.678 | 50 | 0.530   | 0.984   |

Period

|    | contrast          | ratio | SE    | df | t.ratio | p.value |
|----|-------------------|-------|-------|----|---------|---------|
| 1  | NREM / Quiet      | 0.875 | 0.147 | 46 | -0.797  | 0.930   |
| 2  | IS / Quiet        | 0.903 | 0.145 | 46 | -0.634  | 0.969   |
| 3  | IS / NREM         | 1.032 | 0.126 | 46 | 0.261   | 0.999   |
| 4  | REM / Quiet       | 0.918 | 0.188 | 46 | -0.417  | 0.993   |
| 5  | REM / NREM        | 1.049 | 0.185 | 46 | 0.270   | 0.999   |
| 6  | REM / IS          | 1.016 | 0.170 | 46 | 0.095   | 1.000   |
| 7  | Awakening / Quiet | 0.904 | 0.230 | 46 | -0.396  | 0.995   |
| 8  | Awakening / NREM  | 1.033 | 0.243 | 46 | 0.138   | 1.000   |
| 9  | Awakening / IS    | 1.001 | 0.229 | 46 | 0.003   | 1       |
| 10 | Awakening / REM   | 0.985 | 0.258 | 46 | -0.058  | 1.000   |

## b) Penetrating arteriole, cardiac, Lumen

Amplitude

|    | contrast          | ratio | SE    | df  | t.ratio | p.value |
|----|-------------------|-------|-------|-----|---------|---------|
| 1  | NREM / Quiet      | 1.300 | 0.197 | 120 | 1.729   | 0.420   |
| 2  | IS / Quiet        | 1.188 | 0.171 | 120 | 1.194   | 0.755   |
| 3  | IS / NREM         | 0.914 | 0.082 | 120 | -0.999  | 0.856   |
| 4  | REM / Quiet       | 0.935 | 0.189 | 120 | -0.332  | 0.997   |
| 5  | REM / NREM        | 0.720 | 0.124 | 120 | -1.911  | 0.317   |
| 6  | REM / IS          | 0.787 | 0.129 | 120 | -1.460  | 0.590   |
| 7  | Awakening / Quiet | 1.284 | 0.280 | 120 | 1.146   | 0.782   |
| 8  | Awakening / NREM  | 0.988 | 0.186 | 120 | -0.066  | 1.000   |
| 9  | Awakening / IS    | 1.081 | 0.196 | 120 | 0.429   | 0.993   |
| 10 | Awakening / REM   | 1.373 | 0.316 | 120 | 1.377   | 0.644   |

Period

|    | contrast          | ratio | SE    | df  | t.ratio | p.value |
|----|-------------------|-------|-------|-----|---------|---------|
| 1  | NREM / Quiet      | 0.948 | 0.049 | 124 | -1.026  | 0.843   |
| 2  | IS / Quiet        | 0.928 | 0.047 | 124 | -1.460  | 0.590   |
| 3  | IS / NREM         | 0.979 | 0.030 | 124 | -0.679  | 0.961   |
| 4  | REM / Quiet       | 0.765 | 0.048 | 124 | -4.261  | 0.0004  |
| 5  | REM / NREM        | 0.807 | 0.041 | 124 | -4.234  | 0.0004  |
| 6  | REM / IS          | 0.824 | 0.040 | 124 | -3.945  | 0.001   |
| 7  | Awakening / Quiet | 0.781 | 0.053 | 124 | -3.636  | 0.004   |
| 8  | Awakening / NREM  | 0.824 | 0.056 | 124 | -2.825  | 0.043   |
| 9  | Awakening / IS    | 0.841 | 0.057 | 124 | -2.568  | 0.083   |
| 10 | Awakening / REM   | 1.021 | 0.079 | 124 | 0.267   | 0.999   |

## Supplementary Figure 18

### a) Penetrating arteriole, Lumen, Period

VLF

|    | contrast          | ratio | SE    | df  | t.ratio | p.value |
|----|-------------------|-------|-------|-----|---------|---------|
| 1  | NREM / Quiet      | 1.097 | 0.037 | 290 | 2.710   | 0.055   |
| 2  | IS / Quiet        | 1.077 | 0.037 | 290 | 2.159   | 0.199   |
| 3  | IS / NREM         | 0.982 | 0.021 | 290 | -0.859  | 0.912   |
| 4  | REM / Quiet       | 1.201 | 0.044 | 290 | 5.021   | 0.00001 |
| 5  | REM / NREM        | 1.096 | 0.027 | 290 | 3.739   | 0.002   |
| 6  | REM / IS          | 1.116 | 0.028 | 290 | 4.433   | 0.0001  |
| 7  | Awakening / Quiet | 1.105 | 0.068 | 290 | 1.606   | 0.495   |
| 8  | Awakening / NREM  | 1.007 | 0.057 | 290 | 0.128   | 1.000   |
| 9  | Awakening / IS    | 1.026 | 0.059 | 290 | 0.442   | 0.992   |
| 10 | Awakening / REM   | 0.919 | 0.054 | 290 | -1.422  | 0.614   |

LF

|    | contrast          | ratio | SE    | df  | t.ratio | p.value |
|----|-------------------|-------|-------|-----|---------|---------|
| 1  | NREM / Quiet      | 1.074 | 0.035 | 292 | 2.211   | 0.178   |
| 2  | IS / Quiet        | 1.079 | 0.035 | 292 | 2.354   | 0.131   |
| 3  | IS / NREM         | 1.005 | 0.016 | 292 | 0.318   | 0.998   |
| 4  | REM / Quiet       | 0.939 | 0.038 | 292 | -1.566  | 0.520   |
| 5  | REM / NREM        | 0.874 | 0.025 | 292 | -4.753  | 0.00003 |
| 6  | REM / IS          | 0.870 | 0.024 | 292 | -4.976  | 0.00001 |
| 7  | Awakening / Quiet | 0.920 | 0.032 | 292 | -2.395  | 0.120   |
| 8  | Awakening / NREM  | 0.857 | 0.033 | 292 | -4.055  | 0.001   |
| 9  | Awakening / IS    | 0.853 | 0.033 | 292 | -4.137  | 0.0004  |
| 10 | Awakening / REM   | 0.980 | 0.045 | 292 | -0.440  | 0.992   |

## b) Pial artery, Lumen, Period

VLF

|    | contrast          | ratio | SE    | df  | t.ratio | p.value |
|----|-------------------|-------|-------|-----|---------|---------|
| 1  | NREM / Quiet      | 1.096 | 0.031 | 555 | 3.234   | 0.011   |
| 2  | IS / Quiet        | 1.048 | 0.031 | 555 | 1.620   | 0.485   |
| 3  | IS / NREM         | 0.957 | 0.017 | 555 | -2.499  | 0.092   |
| 4  | REM / Quiet       | 1.325 | 0.059 | 555 | 6.363   | 0       |
| 5  | REM / NREM        | 1.209 | 0.045 | 555 | 5.100   | 0.00000 |
| 6  | REM / IS          | 1.264 | 0.048 | 555 | 6.226   | 0       |
| 7  | Awakening / Quiet | 1.056 | 0.055 | 555 | 1.062   | 0.826   |
| 8  | Awakening / NREM  | 0.964 | 0.050 | 555 | -0.708  | 0.955   |
| 9  | Awakening / IS    | 1.008 | 0.052 | 555 | 0.147   | 1.000   |
| 10 | Awakening / REM   | 0.797 | 0.049 | 555 | -3.694  | 0.002   |

LF

|    | contrast          | ratio | SE    | df  | t.ratio | p.value |
|----|-------------------|-------|-------|-----|---------|---------|
| 1  | NREM / Quiet      | 1.150 | 0.023 | 564 | 6.963   | 0       |
| 2  | IS / Quiet        | 1.131 | 0.023 | 564 | 6.008   | 0.00000 |
| 3  | IS / NREM         | 0.983 | 0.012 | 564 | -1.444  | 0.600   |
| 4  | REM / Quiet       | 1.041 | 0.034 | 564 | 1.225   | 0.737   |
| 5  | REM / NREM        | 0.905 | 0.025 | 564 | -3.621  | 0.003   |
| 6  | REM / IS          | 0.920 | 0.025 | 564 | -3.011  | 0.023   |
| 7  | Awakening / Quiet | 0.961 | 0.035 | 564 | -1.096  | 0.809   |
| 8  | Awakening / NREM  | 0.835 | 0.031 | 564 | -4.804  | 0.00002 |
| 9  | Awakening / IS    | 0.850 | 0.032 | 564 | -4.337  | 0.0002  |
| 10 | Awakening / REM   | 0.923 | 0.041 | 564 | -1.795  | 0.377   |
